## 1 ***Drosophila* kinesin-8 stabilises the kinetochore-microtubule interaction**

2  
3 Tomoya Edzuka<sup>1,2</sup> and Gohta Goshima<sup>1,2#</sup>

4  
5 <sup>1</sup> Division of Biological Science, Graduate School of Science, Nagoya University, Furo-cho,  
6 Chikusa-ku, Nagoya 464-8602, Japan

7 <sup>2</sup> Marine Biological Laboratory, Woods Hole, MA 02543, USA

8  
9 #Correspondence should be addressed to: [goshima@bio.nagoya-u.ac.jp](mailto:goshima@bio.nagoya-u.ac.jp)

10 Phone: +81 52-788-6175

### 11 12 **Abstract**

13  
14 Kinesin-8 is required for proper chromosome alignment in a variety of animal and yeast cell types.  
15 However, how this conserved motor protein controls chromosome alignment remains unclear, as  
16 multiple biochemical activities, including inconsistent ones between studies, have been identified  
17 for this motor family. Here, we show that *Drosophila* kinesin-8 Klp67A possesses both  
18 microtubule (MT) plus-end-stabilising and -destabilising activities in addition to commonly  
19 observed MT plus-end-directed motility and tubulin-binding activity *in vitro*, and is required for  
20 stable kinetochore-MT attachment during prometaphase in S2 cells. In the absence of  
21 kinesin-8<sup>Klp67A</sup>, abnormally-long MTs interact in an “end-on” fashion with kinetochores at normal  
22 frequency. However, the interaction was not stable and, once-attached, MTs were frequently  
23 detached. This phenotype was rescued by ectopic expression of MT plus-end-stabilising factor  
24 CLASP, but not by artificial shortening of MTs. These results suggest that MT-stabilising activity  
25 of kinesin-8<sup>Klp67A</sup> is critical for stable kinetochore-MT attachment. Finally, human kinesin-8<sup>KIF18A</sup>  
26 was also shown important to ensure proper MT attachment.

### 27 28 **Introduction**

29 Equal segregation of sister chromatids into daughter cells relies on proper attachment of  
30 microtubules (MTs) to a specialised site on the chromosome, the kinetochore. Kinetochores  
31 consist of dozens of proteins, including those that bind to DNA or MTs, and many of them form  
32 subcomplexes for normal function (Musacchio and Desai, 2017). The Ndc80 complex is localised  
33 to the kinetochore during mitosis and functions as the major MT attachment site: “end-on”  
34 attachment of MTs to kinetochores absolutely depends on this conserved protein complex  
35 (Cheeseman et al., 2006; Musacchio and Desai, 2017; Powers et al., 2009). In yeast and animals,  
36 the Dam1 and Ska complexes, respectively, support MT binding of the Ndc80 complex (Schmidt  
37 et al., 2012; Tien et al., 2010). However, these complexes might not be the sole critical factors for  
38 MT attachment, as other MT-associated proteins, such as motor proteins, are also enriched at the  
39 kinetochore (Musacchio and Desai, 2017).

40 Besides attachment, kinetochores regulate the dynamics of the associated MTs. A major  
41 regulator is cytoplasmic linker associated protein (CLASP), which promotes persistent growth of  
42 kinetochore MTs (Maiato et al., 2003; Maiato et al., 2005). In its absence, MTs continuously  
43 shrink and spindles collapse (Maiato et al., 2005). *In vitro*, CLASP retards MT growth and acts as  
44 a potent inhibitor of MT “catastrophe” and as an inducer of “rescue” (Al-Bassam et al., 2010;  
45 Moriwaki and Goshima, 2016; Yu et al., 2016). Another key regulator of kinetochore MT  
46 dynamics is the kinesin-8 motor protein.

1 Kinesin-8 is a widely conserved kinesin subfamily. Its motor domain lies at the N-terminus,  
2 followed by coiled-coil and tail regions. The mitotic functions of kinesin-8 have been well  
3 described for budding yeast Kip3 (Cottingham and Hoyt, 1997; Straight et al., 1998; Tytell and  
4 Sorger, 2006; Wargacki et al., 2010), fission yeast Klp5/Klp6 (Garcia et al., 2001; West et al.,  
5 2002), *Drosophila* Klp67A (Gandhi et al., 2004; Goshima and Vale, 2003; Savoian et al., 2004;  
6 Savoian and Glover, 2010), and mammalian KIF18A (Mayr et al., 2007; Stumpff et al., 2008) and  
7 KIF18B (McHugh et al., 2018). Kinesin-8 is generally enriched at the outer region of the mitotic  
8 kinetochore, where plus ends of kinetochore MTs are present, and its depletion affects spindle  
9 length and chromosome alignment. In human KIF18A RNAi, the amplitude of chromosome  
10 oscillation in the abnormally-elongated spindle is dramatically elevated, such that chromosome  
11 congression cannot be achieved. In the absence of budding yeast Kip3, kinetochores are  
12 unclustered in the spindle, indicating chromosome alignment defects. Fission yeast *klp5/6* mutant  
13 also exhibits chromosome misalignment associated with Mad2-dependent mitotic delay. Overall,  
14 the loss of kinesin-8 consistently perturbs chromosome alignment in a variety of cell types.

15 Despite the conserved phenotype and localisation associated with kinesin-8, its biochemical  
16 activity towards MTs is inconsistent between reports. The best-studied budding yeast Kip3 has  
17 plus-end-directed, processive motility and also has strong MT depolymerising activity; it can  
18 depolymerise MTs stabilised by GMPCPP (non-hydrolysable GTP) and promote catastrophe  
19 (growth-to-shrinkage transition) in dynamic MTs (Gupta et al., 2006; Varga et al., 2006). The  
20 C-terminal tail has MT- and tubulin-binding activities, which allow this motor to crosslink and  
21 slide antiparallel MTs (Su et al., 2013; Su et al., 2011). However, MT depolymerisation activity has  
22 not been detected for fission yeast proteins Klp5/Klp6 and MT nucleation activity has been  
23 reported instead (Erent et al., 2012). Humans have two mitotic kinesin-8s, KIF18A and KIF18B,  
24 and kinetochore function has been observed for KIF18A. KIF18A, like Kip3, exhibits processive  
25 motility towards plus ends, and accumulates at plus ends on its own (Du et al., 2010; Mayr et al.,  
26 2007). The tail region of KIF18A has MT and tubulin affinity, which is similar to Kip3 (Mayr et al.,  
27 2011; Weaver et al., 2011). However, its impact on MT dynamics has been controversial. In one  
28 study, KIF18A was concluded to have MT depolymerising activity, based on its depolymerisation  
29 activity towards stabilised MTs (Mayr et al., 2007). In another study, however, this activity was  
30 reported to be undetectable, and instead, it dampened MT dynamicity; KIF18A suppressed both  
31 growth and shrinkage of MTs (Du et al., 2010). Although the former activity is more consistent  
32 with Kip3, the latter activity appears to be more congruous with the cellular phenotype associated  
33 with KIF18A (Stumpff et al., 2008).

34 In the present study, we investigated Klp67A, the sole mitotic kinesin-8 in *Drosophila*. In  
35 addition to conserved MT-based motility, we identified both MT stabilising and destabilising  
36 activities in a single experimental condition. Functional analysis in the S2 cell line indicated that,  
37 with these two activities, kinesin-8<sup>Klp67A</sup> not only regulates MT length, but also stabilises  
38 kinetochore-MT attachment.

## 39 40 **Results**

### 41 42 **Kinesin-8<sup>Klp67A</sup> shows plus-end-directed motility and tubulin-binding activity *in vitro***

43 Generally observed biochemical activities among mitotic kinesin-8 motors are processive  
44 motility (Gupta et al., 2006; McHugh et al., 2018; Stumpff et al., 2011; Varga et al., 2006) and  
45 tubulin binding at the non-motor region (Mayr et al., 2011; Su et al., 2011; Weaver et al., 2011).  
46 To determine the biochemical activity of *Drosophila* kinesin-8<sup>Klp67A</sup>, we purified recombinant

1 GFP-tagged full-length protein (Fig. S1A). First, we performed single motor motility assays and  
2 found that kinesin-8<sup>Klp67A</sup>-GFP is a processive motor with mean velocity  $25 \pm 0.7 \mu\text{m}/\text{min}$  ( $\pm$   
3 SEM) (Fig. 1A, B, Movie 1). The GFP signal quickly accumulated at one end of MTs: therefore,  
4 to visualize how each motor accumulates at the MT end, we photo-bleached the pre-accumulated  
5 kinesin-8<sup>Klp67A</sup>-GFP signals at the end, followed by observing unbleached motors. In 32 out of 33  
6 cases, we observed that the motile motor on the MT lattice reached and stayed at the end of the  
7 MT polymers (Fig. 1A, Movie 1). Thus, kinesin-8<sup>Klp67A</sup>-GFP processively moved to the end and  
8 resided there for a certain period; this behaviour is identical to that observed for Kip3 (Varga et al.,  
9 2009). Next, we determined the directionality of motility by localising kinesin-8<sup>Klp67A</sup>-GFP on  
10 MTs that underwent gliding by the plus-end-directed kinesin-1 motor (Fig. 1C).  
11 Kinesin-8<sup>Klp67A</sup>-GFP was enriched at the trailing end of MTs, indicating that kinesin-8<sup>Klp67A</sup> is a  
12 plus-end-directed motor, as seen with other kinesin-8s (Fig. 1D).

13 To test if kinesin-8<sup>Klp67</sup> binds to tubulin, like Kip3 and KIF18A, we performed sucrose  
14 gradient centrifugation of recombinant kinesin-8<sup>Klp67A</sup>-GFP in the presence and absence of tubulin.  
15 Kinesin-8<sup>Klp67A</sup>-GFP was co-fractionated with tubulin as a larger complex, indicating that  
16 kinesin-8<sup>Klp67A</sup> directly binds to tubulin (Fig. 2A). Next, to verify this finding and further identify  
17 the region responsible for tubulin binding, we performed tubulin recruitment assay, in which  
18 kinesin-8<sup>Klp67A</sup> (full-length and truncations) was localised along the stabilised MT seed and  
19 fluorescently-labelled free tubulin was added and observed (Fig. 2B, C, S1B). Consistent with the  
20 sucrose gradient centrifugation analysis, tubulin was efficiently recruited to the MT seed by  
21 kinesin-8<sup>Klp67A</sup> full-length (Fig. 2D, E). C-terminally truncated “tail-less” construct (1–612 a.a.),  
22 which was shown to rescue the spindle length and chromosome alignment phenotypes (Savoian  
23 and Glover, 2010), also recruited tubulin onto MT seeds, albeit less efficiently than full-length.  
24 However, when non-motor regions were entirely eliminated, tubulin was hardly recruited. These  
25 results indicate that kinesin-8<sup>Klp67A</sup> binds to tubulin at the non-motor region and suggest that the  
26 binding is important for kinesin-8<sup>Klp67A</sup> function.

### 27 28 **Kinesin-8<sup>Klp67A</sup> has both MT-destabilising and -stabilising activities *in vitro***

29 We next determined the effect of kinesin-8<sup>Klp67A</sup> on MT polymerisation dynamics in an *in*  
30 *vitro* assay (Fig. 3A). When we mixed 5, 10, 20, or 50 nM kinesin-8<sup>Klp67A</sup> with  
31 GMPCPP-stabilised MT seeds and free tubulin (10  $\mu\text{M}$ ), dynamic MTs from the seeds were rarely  
32 observed or non-existent at 20 nM or 50 nM, respectively (Fig. 3B). Furthermore, at high  
33 concentrations, the excess force exerted by kinesin-8<sup>Klp67A</sup> glided and bundled MT seeds. In the  
34 subsequent experiment, we used 5 or 10 nM kinesin-8<sup>Klp67A</sup>.

35 First, we could not observe any MT depolymerisation activity of kinesin-8<sup>Klp67A</sup> towards  
36 GMPCPP-stabilised MTs, which differs from that for yeast Kip3 (Gupta et al., 2006; Varga et al.,  
37 2006), human KIF18A reported by (Locke et al., 2017; Mayr et al., 2007), or the bona fide  
38 MT-depolymerising *Drosophila* kinesin-13<sup>Klp10A</sup> (Rogers et al., 2004) that was used as a positive  
39 control in our experiments (Fig. S1C). However, we could not exclude the possibility that  
40 kinesin-8<sup>Klp67A</sup> has a weak seed depolymerisation activity that was undetectable with this motor  
41 concentration.

42 Next, we quantified the dynamics parameters in the presence of 5 or 10 nM kinesin-8<sup>Klp67A</sup>  
43 (Fig. 3C–G). As expected from the spindle lengthening phenotype, kinesin-8<sup>Klp67A</sup> elevated the  
44 catastrophe frequency of the MTs. Interestingly, kinesin-8<sup>Klp67A</sup> also increased the rescue  
45 frequency and slowed down shrinkage under the same assay conditions, which resulted in more  
46 frequent MT pausing (Fig. 3H). Thus, we observed both MT-stabilising and -destabilising effects

1 reported for kinesin-8<sup>KIF18A</sup> by (Du et al., 2010) and (Locke et al., 2017; Mayr et al., 2007),  
2 respectively. The growth rate was increased in a slight but statistically significant manner, which  
3 is consistent with a recent report concerning human kinesin-8<sup>KIF18B</sup> (McHugh et al., 2018).

4 Finally, we analysed the correlation between the amount of kinesin-8<sup>Klp67A</sup>-GFP at the plus  
5 end and the MT growth/shrinkage rate. We measured and plotted GFP intensity at the tip and the  
6 velocity of the MTs (Fig. 3I, J). GFP intensity at the shrinking tip was, on average, slightly higher  
7 than that at the growing tip (Fig. S1D). Whether this small difference is of physiological relevance  
8 is unclear. Interestingly, there was a strong anti-correlation between GFP intensity and shrinking  
9 velocity ( $p < 2 \times 10^{-16}$ , gamma regression, likelihood-ratio tests; Fig. 3J), whereas no clear  
10 correlation was identified for growth ( $p = 0.99$ ; Fig. 3I). The data is consistent with the model that  
11 kinesin-8<sup>Klp67A</sup> accumulated at the tip induces catastrophe but simultaneously prohibits drastic  
12 shrinkage. On the other hand, the mechanism by which kinesin-8<sup>Klp67A</sup> increases the MT growth  
13 rate is unclear.

### 14 15 **Kinesin-8<sup>Klp67A</sup> depletion causes instability of kinetochore-MT attachment**

16 To explore the function of kinesin-8<sup>Klp67A</sup> in the spindle, we observed its RNAi phenotype in  
17 living S2 cells (RNAi knockdown was confirmed by immunoblotting; Fig. S2A). In addition to  
18 chromosomes and MTs, we traced GFP-Rod: GFP-Rod accumulates at unattached or  
19 laterally-attached kinetochores and, once MTs are attached in an end-on fashion, it is transported  
20 away from the kinetochore along the MTs (Basto et al., 2004; Gluszek et al., 2015). Therefore,  
21 GFP-Rod exhibits “streaming” upon MT end-on attachment, while residual proteins are still  
22 visible at the kinetochore; thus, it serves as an ideal marker for kinetochore dynamics as well as  
23 for its attachment status (Fig. 4A). To precisely monitor and evaluate the dynamics of individual  
24 chromosome and GFP-Rod signals in the uniformly-shaped spindle, we induced monopolar  
25 spindles by depleting Klp61F, the kinesin-5 motor protein required for spindle bipolarisation. MTs  
26 were stained with the SiR-tubulin dye. In control cells that were singly depleted of kinesin-5<sup>Klp61F</sup>,  
27 we observed that the majority of sister kinetochores were attached to MTs from the pole (“syntelic”  
28 attachment), with weak GFP-Rod signals detected (Fig. 4B, Movie 2). The syntelically attached  
29 kinetochores were static and scarcely changed position during the observation time. In some  
30 instances, we observed “monotelic” attachment at the beginning, where one of the sister  
31 kinetochores was not associated with MTs and, therefore, a strong GFP-Rod signal was detected  
32 (Fig. 4C, 12 s). However, they were converted into syntelic attachments during imaging, which  
33 was characterised by GFP-Rod streaming along the newly formed kinetochore MTs (Fig. 4C, 153  
34 s). Once syntelic attachment was established, MTs were rarely dissociated from kinetochores (Fig.  
35 4D, control).

36 When kinesin-5<sup>Klp61F</sup> and kinesin-8<sup>Klp67A</sup> were co-depleted, monopolar spindles with much  
37 longer MTs were assembled (Fig. 4B). In addition, kinetochore dynamics were dramatically  
38 different in these cells (Movie 2). Some kinetochores were visibly motile, and monotelic  
39 attachment was more frequently observed for those chromosomes. Most of the unattached  
40 kinetochores acquired end-on attachment during the imaging period, as indicated by GFP-Rod  
41 streaming (e.g. Fig. 4C, 171–174 s), although the associations were often transient. Quantification  
42 indicated detachment of MTs from the kinetochore was significantly more frequently observed in  
43 the absence of kinesin-8<sup>Klp67A</sup>, whereas end-on attachment event was detected at a frequency  
44 similar to that in control cells (Fig. 4D, E). Interestingly, MT detachment was usually associated  
45 with chromosome flipping, where a sister kinetochore originally distal from the pole was flipped  
46 to face the pole (e.g. Fig. 4C, 89–153 s).

1 To verify that the observed phenotype is not an artefact of SiR-tubulin staining, we observed  
2 a cell line that expressed GFP-Rod, H2B-mCherry, and EB1-SNAP (fluorescent SiR-SNAP was  
3 added to the medium), in which EB1 served as a marker of kinetochore MTs (Fig. S2B). In  
4 addition, we simply observed GFP-Rod and H2B-mCherry without MT markers (Fig. S2D). In  
5 the absence of kinesin-8<sup>Klp67A</sup>, chromosome flipping was 19-fold more frequently observed than in  
6 control cells (n = 15 and 27), confirming the role of kinesin-8<sup>Klp67A</sup> in stable kinetochore-MT  
7 attachment in the monopolar spindle (Fig. S2C).

8 We next observed GFP-Rod behaviour in the bipolar spindle with and without kinesin-8<sup>Klp67A</sup>  
9 (Fig. 5). As previously reported, abnormally-elongated spindles with unaligned chromosomes  
10 were observed in the absence of kinesin-8<sup>Klp67A</sup>. Since MTs were crowded in the spindle, it was  
11 impossible to observe MT attachment status for most kinetochores. Nevertheless, when we  
12 focused on completely unaligned chromosomes that were remote from the main body of the  
13 spindle, we observed a phenotype similar to that observed in the monopolar assay. In the control  
14 cell displayed in Fig. 5A and Movie 3, a chromosome (arrow) was not immediately captured by  
15 MTs and remained near the pole; it had strong GFP-Rod signals. However, MTs were generated  
16 independent of centrosomes and bound to the kinetochore (63 s). Once those MTs were formed,  
17 the flow of GFP-Rod was visible, concomitant with the decrease of the kinetochore signal  
18 intensity (93–180 s). Thus, a bi-oriented chromosome with “amphitelic” attachment was finally  
19 observed, and it was translocated towards the spindle equator (375 s). In contrast, MT attachment  
20 was unstable and MT detachment was observed in kinesin-8<sup>Klp67A</sup>-depleted cells. In the case  
21 displayed in Fig. 5B and Movie 3, a misaligned chromosome (arrow) achieved amphitelic  
22 attachment at 114 s, as evident by GFP-Rod stream along chromosome-bound MTs, but then such  
23 a configuration was disrupted at 198 s and the chromosome was flipped (198–285 s). MT  
24 detachment frequency was quantified in Fig. 5C.

25 Finally, we treated the metaphase cells with a MT destabilising drug and preferentially  
26 depolymerised non-kinetochore MTs. In control cells, kinetochore MTs kept the chromosomes  
27 aligned at the metaphase plate in 88% of the cases (n = 25) for  $\geq 15$  min, as expected (Goshima et  
28 al., 2008). In contrast, at least one chromosome that had been located at the metaphase plate was  
29 misaligned in 78% of the cells in the absence of kinesin-8<sup>Klp67A</sup> (Fig. 5D).

30 From these results, we concluded that the kinetochore-MT association becomes unstable in  
31 the absence of kinesin-8<sup>Klp67A</sup>.

### 32 **Artificial MT destabilisation does not rescue the kinesin-8<sup>Klp67A</sup>-depleted phenotype**

33 Attachment instability might be the consequence of longer MTs in the absence of  
34 kinesin-8<sup>Klp67A</sup>. To test this possibility, we depleted kinesin-5<sup>Klp61F</sup> and Dgt6, an essential subunit  
35 of the MT amplifier augmin, to generate monopolar spindles with long MTs; MTs are elongated  
36 in this condition due to the reduction of MT nucleation sites within the spindle (Goshima et al.,  
37 2008). Augmin<sup>Dgt6</sup>/kinesin-5<sup>Klp61F</sup> RNAi-treated cells indeed exhibited much longer and pendulous  
38 MTs, similar to those observed after kinesin-8<sup>Klp67A</sup> depletion (Fig. S3A, Movie 4). Monotelic and  
39 syntelic attachments were both observed, similar to that seen in kinesin-8<sup>Klp67A</sup>-depleted cells.  
40 However, once-attached, MTs were more persistent and chromosome flipping was rarely  
41 observed (Fig. 6D).

42 To further exclude the possibility that abnormally-elongated MTs due to reduced catastrophe  
43 are the major cause of MT attachment instability, we exposed a low dosage of colcemid to  
44 kinesin-8<sup>Klp67A</sup> RNAi-treated cells and shortened the bipolar spindle lengths to the control levels  
45 (Fig. S3B, C). Unaligned chromosomes were still frequently observed and mitosis was  
46

1 significantly delayed (Fig. S3B, D). These results suggested that regulation of MT length alone  
2 cannot explain the attachment instability of kinesin-8<sup>Klp67A</sup>-depleted cells.

### 3 4 **Aurora B kinase inhibition or CLASP<sup>Mast/Orbit</sup> overexpression rescues attachment instability** 5 **caused by kinesin-8<sup>Klp67A</sup> depletion**

6 In mammalian cells, inhibition of Aurora B kinase stabilises syntelic attachment, at least  
7 partly due to dephosphorylation of Ndc80: Ndc80 is a critical kinetochore component for MT  
8 binding and its MT binding affinity is decreased by Aurora B phosphorylation (Cheeseman et al.,  
9 2002; DeLuca et al., 2006; Lampson and Grishchuk, 2017; Musacchio and Desai, 2017). We  
10 added the inhibitor of *Drosophila* Aurora-B, Binucleine-2 (Smurnyy et al., 2010), to S2 cells  
11 depleted of kinesin-8<sup>Klp67A</sup>/kinesin-5<sup>Klp61F</sup>, and observed that most kinetochores stably attached  
12 MTs in a syntelic manner, as indicated by a decrease in GFP-Rod signals (Fig. 6A, B, Movie 5).  
13 The result indicates that kinetochores retain an ability to bind stably to MTs in the absence of  
14 kinesin-8<sup>Klp67A</sup>, when Aurora B activity is low. Our interpretation is that the MT-binding potential  
15 of the dephosphorylated form of Ndc80 complexes is preserved in the absence of kinesin-8<sup>Klp67A</sup>.

16 In the absence of kinesin-8<sup>Klp67A</sup>, persistent poleward motility of chromosomes was observed,  
17 which would involve kinetochore MT shrinkage (Movie 2). We hypothesised that the MT  
18 stabilisation activity of kinesin-8<sup>Klp67A</sup>, namely slowing down MT shrinkage and inducing  
19 rescue/pausing, is critical for MT attachment stability. If that were the case, we reasoned that MT  
20 stabilisation by other means might partially suppress the MT detachment phenotype. To this end,  
21 we expressed *Drosophila* CLASP (also called Mast or Orbit) in kinesin-8<sup>Klp67A</sup>/kinesin-5<sup>Klp61F</sup>  
22 RNAi cells and observed the consequent chromosome dynamics. Since we attached GFP to  
23 CLASP<sup>Mast/Orbit</sup> to identify cells overexpressing CLASP<sup>Mast/Orbit</sup>, GFP-Rod signals could not be  
24 used to evaluate MT-kinetochore attachment status. Nevertheless, chromosome flipping frequency  
25 was significantly reduced in GFP-CLASP<sup>Mast/Orbit</sup> overexpressing cells, supporting our hypothesis  
26 (Fig. 6C–E, Movie 6). However, spindle length, chromosome alignment, and mitotic duration  
27 were not restored by GFP-CLASP<sup>Mast/Orbit</sup> overexpression (Fig. S4). The suppression was thus  
28 specific to MT attachment stability.

### 29 30 **GFP-Mad2 accumulation after KIF18A RNAi in HeLa cells**

31 Several studies have characterised loss-of-function phenotypes for human kinesin-8, KIF18A  
32 (Janssen et al., 2018; Kim and Stumpff, 2018; Mayr et al., 2007; Stumpff et al., 2008; Stumpff et  
33 al., 2012). The components of the spindle assembly checkpoint (SAC) have been also analysed in  
34 a few studies using fixed cells (Janssen et al., 2018; Kim and Stumpff, 2018; Mayr et al., 2007).  
35 To confirm the phenotype and also possibly gain new insights into KIF18A function, we  
36 performed our own RNAi analysis using living HeLa cells expressing GFP-Mad2: Mad2 is a  
37 major component of SAC, and is rapidly recruited to the kinetochores that are not properly  
38 attached to MTs (Joglekar, 2016). For example, upon laser cutting of kinetochore MTs, Mad2  
39 signals appeared within a few minutes (Dick and Gerlich, 2013).

40 We first confirmed that punctate signals of GFP-Mad2 were rarely detected on aligned  
41 chromosomes but were often observed in prometaphase, during which the majority of the  
42 kinetochores were unattached to MTs (Fig. 7A). They were also detectable when spindle MTs at  
43 metaphase were depolymerised with nocodazole (Fig. 7B).

44 Second, we observed GFP-Mad2 every 4 s in the monopolar spindle assembled by inhibiting  
45 kinesin-5 in the presence or absence of KIF18A, which was an assay analogous to those  
46 performed in S2 cells. However, in HeLa, GFP-Mad2 was constantly observed and chromosomes

1 were dynamic even in the control cells: we could not identify a defect in the KIF18A  
2 RNAi-treated cells by our eyes (n = 41 cells; Movie 7).

3 We then observed GFP-Mad2 dynamics in the bipolar spindle in the absence of KIF18A in  
4 two conditions. First, we treated cells with MG132 to arrest them at metaphase and performed  
5 imaging of a single focal plane of multiple mitotic cells every 30 s for 15 min (Fig. 7C). We  
6 analysed a total of 47 metaphase cells for control and KIF18A-depleted cells. In this  
7 artificially-arrested condition, unaligned chromosomes with strong punctate Mad2 signals were  
8 observed in control and KIF18A RNAi samples at similar frequencies (40% and 36%). In contrast,  
9 Mad2 signals also appeared on aligned chromosomes — often transiently — in 81% of the cells  
10 missing KIF18A, while only 36% of the control cells displayed such behaviour (Fig. 7C, D; arrow  
11 indicates the GFP-Mad2 signal). The results suggested that, in the absence of KIF18A, a  
12 subpopulation of seemingly aligned chromosomes had an improper attachment. Moreover, the  
13 transient signal appearance suggested that Mad2-negative kinetochores (i.e. properly attached  
14 kinetochores) occasionally altered their attachment status and became Mad2-positive.  
15 Alternatively, the Mad2 appearance/disappearance might simply reflect the kinetochore motility in  
16 and out of focal plane of the microscope.

17 To further test if Mad2-negative chromosomes could become Mad2 positive in the absence of  
18 KIF18A, we acquired z-stack images of normally cycling cells every 3 min for 30 min after RNAi  
19 (0.5  $\mu$ m separation, >30 sections, by which the entire chromosome sets were covered at the  
20 beginning of imaging). Interestingly, in 70% cells (n = 23), GFP-Mad2 signals appeared on  
21 chromosomes which had not displayed any signals in previous time frames (Fig. 7E, F, blue  
22 arrows). The signal intensity was generally weaker than that observed on persistently unaligned  
23 chromosomes (yellow arrowheads in Fig. 7F), supporting the idea that the GFP-Mad2 emerged on  
24 those chromosomes during metaphase instead of persisting from early prometaphase. From these  
25 results, we concluded that once-disappeared GFP-Mad2 could reemerge in the absence of KIF18A.  
26 Thus, KIF18A may be required to maintain proper attachment status between MTs and  
27 kinetochores.

## 28 Discussion

### 29 Biochemical activity of kinesin-8<sup>Klp67A</sup>

30 We observed the processive plus-end-directed motility, catastrophe-induction, and  
31 rescue/pausing activities of kinesin-8<sup>Klp67A</sup> towards MTs. This combination of activities has not  
32 been observed for another five *Drosophila* MT plus-end-regulating proteins we have characterised  
33 so far using an identical assay (Li et al., 2012; Moriwaki and Goshima, 2016). Motility and  
34 catastrophe induction can be deduced from the amino acid sequences of Klp67A's motor domain;  
35 the motor has been shown to be critical in a previous study using a rigor mutant (Savoian and  
36 Glover, 2010). In contrast, how rescue/pausing activity and also mild growth-accelerating activity  
37 are executed remains unclear; it might involve the usage of the tubulin-binding region next to the  
38 motor domain to increase the local concentration of tubulin.

39 Whether human KIF18A is a depolymerase (Locke et al., 2017; Mayr et al., 2007) or MT  
40 dynamics suppressor (Du et al., 2010) has been debated. However, those studies used distinct  
41 assay and buffer conditions *in vitro*; it is possible that KIF18A can execute both activities in cells,  
42 namely, being endowed with a similar set of activities to *Drosophila* Klp67A. Budding yeast Kip3  
43 is an established MT depolymerase, but rescue and pausing frequencies are also reduced in the  
44 mutant *in vivo* (Gupta et al., 2006), for which the tubulin-binding region is involved (Su et al.,  
45  
46

1 2011). Our study suggests that the multiple activities observed here for kinesin-8<sup>Klp67A</sup> in a single  
2 experimental condition are widely conserved among kinetochore-localised kinesin-8s.

### 3 4 **Kinesin-8<sup>Klp67A</sup> is required for stable kinetochore-MT attachment**

5 Previous studies using RNAi or mutants of kinesin-8<sup>Klp67A</sup> consistently reveal its role in  
6 spindle length regulation (Buster et al., 2007; Gatt et al., 2005; Goshima and Vale, 2003; Goshima  
7 and Vale, 2005; Goshima et al., 2005; Savoian et al., 2004; Wang et al., 2010). This was  
8 confirmed in this study, and most likely is attributed to the catastrophe-inducing function.  
9 However, experiments involving colcemid treatment indicated that MT elongation with reduced  
10 catastrophe is not the causal factor leading to chromosome misalignment. GFP-Rod imaging  
11 further uncovered a specific role of kinesin-8<sup>Klp67A</sup> at the kinetochore-MT interface: it ensures  
12 persistent MT attachment to the kinetochore.

13 Why are MTs frequently detached in the absence of kinesin-8<sup>Klp67A</sup>? We observed that  
14 overexpression of the MT rescue/pausing factor CLASP largely rescued the flipping behaviour of  
15 chromosomes. Since flipping is associated with the detachment event, we interpret that CLASP  
16 overexpression reduced MT detachment rates. The data therefore suggest that kinetochores are  
17 prone to detach from MTs during rapid and persistent depolymerisation. On the other hand, *in*  
18 *vitro* study using Ndc80-decorated beads and depolymerising MTs indicated robust load-bearing  
19 attachment of the beads during depolymerisation (Powers et al., 2009). However, this observation  
20 might be reconciled with our findings, as Aurora B kinase could dampen Ndc80's MT binding  
21 ability in cells. Consistent with this notion, we observed stable MT association when Aurora B  
22 kinase was inhibited. We propose that kinesin-8<sup>Klp67A</sup> constitutes an additional layer of the MT  
23 attachment interface.

### 24 25 **Functional similarity and difference between *Drosophila* and human kinesin-8s**

26 It was previously reported that KIF18A depletion increases the amplitude of chromosome  
27 oscillation, where MT dynamics regulation, rather than attachment per se, is defective (Stumpff et  
28 al., 2008). This behaviour is consistent with the *in vitro* MT stabilisation activity (Du et al., 2010).  
29 However, a more recent study suggested that kinetochore-MT interaction is also perturbed in this  
30 condition (Kim and Stumpff, 2018). The study attributes the phenotype partly to defects in  
31 KIF18A-dependent PP1 delocalisation (Kim and Stumpff, 2018); however, those investigations  
32 also showed the presence of a PP1-independent function of KIF18A for chromosome alignment. It  
33 remains to be determined if PP1 mis-localisation contributes to chromosome misalignment in the  
34 absence of kinesin-8<sup>Klp67A</sup>, which does not possess the PP1-binding motif (De Wever et al., 2014).

35 While we were revising the manuscript, a new report on human KIF18A function was  
36 published, in which KIF18A depletion phenotype was investigated in a haploid cell line as well as  
37 HeLa cells (Janssen et al., 2018). In this report, MTs and Mad1 (binding partner of Mad2) were  
38 immuno-stained in the metaphase-arrested cell in the absence of KIF18A and three interesting  
39 conclusions have been drawn: 1) Mad1 is detected on multiple, but not all, kinetochores in the  
40 absence of KIF18A, which was consistent with a previous report using Mad2 (Mayr et al., 2007);  
41 2) similar numbers of MTs are associated with each kinetochore, regardless of the presence or  
42 absence of Mad1 accumulation (i.e. MT-kinetochore attachment is not disrupted in the absence of  
43 KIF18A); 3) nevertheless, tension is not sufficiently applied to Mad1-positive kinetochores. Our  
44 data obtained in live cells confirmed the first point. We detected even fewer numbers of Mad2  
45 signals than Janssen et al (2018); this might be due to the difference in knockdown efficiency  
46 or methodology (live cell imaging vs. immunostaining after pre-extraction of the cell). In contrast,



1 neither study has revealed the mechanism by which tension is reduced despite the apparently  
2 similar numbers of MTs attached in an end-on fashion to the kinetochore. However, it would be  
3 reasonable to assume that kinetochore-MT attachment is somewhat skewed in the absence of  
4 KIF18A. Our data suggests that this could occur even when attachment has been once established.  
5 In this regard, it is intriguing that we could not identify an apparent defect in the monopolar  
6 spindle. KIF18A may be particularly critical in the bipolar spindle, in which it might fine-tune the  
7 attachment mode for the kinetochore to generate sufficient tension.

8 Our data and those in Janssen et al. (2018) both agreed that MT attachment does not require  
9 KIF18A, which is consistent with the conclusion drawn from the analysis using *Drosophila*  
10 Klp67A. However, in the case of *Drosophila*, the loss of Klp67A caused MT detachment from the  
11 kinetochore, whereas the KIF18A depletion phenotype was milder. This was possibly due to the  
12 presence of other regulators of kinetochore-MT attachment in mammals, such as Ska and  
13 SKAP/astrin complexes, which are missing in *Drosophila* (Kern et al., 2017; Schmidt et al., 2012).  
14 Nevertheless, proper attachment does require KIF18A function, as reflected by the appearance of  
15 Mad1/Mad2 signals and the loss of tension in the absence of KIF18A (Janssen et al., 2018). Thus,  
16 KIF18A ensures the attachment mode for the kinetochore to generate sufficient tension. Several  
17 studies suggest an involvement of KIF18A in carcinogenesis (Hitti et al., 2016; Zhang et al., 2010).  
18 It would be intriguing to investigate how KIF18A contributes to chromosome segregation in  
19 various cancer cell models.

## 20 21 **Materials and methods**

### 22 23 *RNAi and cell line selection*

24 S2 cell culture and RNAi were performed as previously described (Bettencourt-Dias and Goshima,  
25 2009; Goshima et al., 2007; Ito and Goshima, 2015). In brief, Schneider's medium (Gibco)  
26 supplemented with 10% serum was used for cell culture. Cell lines were selected with hygromycin  
27 or puromycin following plasmid transformation with the TransIT-Insect reagent (Takara).  
28 Plasmids used in this study are listed in Table S1, whereas dsRNA sequences employed here are  
29 available at (Goshima and Vale, 2005; Goshima et al., 2007). For RNAi experiments, cells were  
30 treated with dsRNAs for 3–4 days and then plated on concanavalinA-coated glass-bottom dishes  
31 for microscopy. HeLa cells stably expressing GFP-Mad2 (a gift of Dr. Tomomi Kiyomitsu  
32 [Nagoya University]) were cultured in DMEM with 10% serum. RNAi was conducted with  
33 RNAiMax (Invitrogen) and 25 nM siRNA previously described  
34 (UAAAUUACCCGAACAAGAAatt; (Tanenbaum et al., 2009)). Imaging was started at 24 h.

### 35 36 *Microscopy*

37 S2 MTs were stained with 15 nM SiR-tubulin, whereas EB1-SNAP was visualized with 15–30 nM  
38 SiR-SNAP. Live S2 imaging was performed with a spinning-disc confocal microscope (Nikon Ti;  
39 100× 1.45 NA or 60 × 1.40 NA lens, EMCCD camera ImagEM [Hamamatsu], CSU-X1  
40 [Yokogawa]). A TIRF microscope was used in the *in vitro* MT dynamics experiment (Nikon Ti;  
41 100× 1.49 NA lens, EMCCD camera Evolve [Roper]). 488/561/640-nm excitation lasers were  
42 associated with both microscopes. Microscopes were controlled by micromanager and images  
43 were processed with ImageJ. For the colcemid treatment experiment in Fig. 5D, S2 cells  
44 expressing GFP-Rod and H2B-mCherry were stained with 15 nM SiR-tubulin and treated with 25  
45  $\mu$ M MG132 ( $\geq$  30 min). Cells were imaged every 1 min for 20 min, and 5  $\mu$ g/mL colcemid was  
46 supplied at 2 min. In Fig. S3B–D, cells were treated with 60 ng/mL colcemid for 2 h; images were

1 acquired every 2 min. All imaging was performed at approximately 25°C. HeLa cells expressing  
2 GFP-Mad2 by CMV promoter were stained with 50 nM SiR-tubulin. Metaphase arrest, MT  
3 depolymerisation, and monopolar spindle formation were induced by 25 µM MG132, 100 nM  
4 nocodazole, and 5 µM STLC (a kinesin-5 inhibitor), respectively ( $\geq 1$  h).

#### 6 *Protein purification*

7 S2 tubulin was purified by using a previously described method, using GST-tagged TOG1 domain  
8 (*S. cerevisiae* Stu2, 1–306 a.a.) (Moriwaki and Goshima, 2016; Widlund et al., 2012).  
9 Klp67A-GFP-6His was expressed in *E. coli* SoluBL21 cells (250 mL culture in L-rich medium,  
10 0.1–0.5 mM IPTG at 18°C for 16–20 h). Cells were resuspended in Lysis Buffer (50 mM  
11 MOPS-NaOH [pH = 7.2], 250 mM NaCl, 2 mM MgCl<sub>2</sub>, 1 mM EGTA, 0.5 mM  
12 Phenylmethylsulfonyl fluoride (PMSF), peptide cocktail (1 µg/ml leupeptin, pepstatin, chymostatin,  
13 and aprotinin), 2 mM 2-mercaptoethanol, 0.1 mM ATP), sonicated with a homogeniser (Branson,  
14 450DA), bound to Ni-NTA (4°C, 60–90 min), washed with Wash Buffer (Lysis Buffer  
15 supplemented with 20 mM imidazole and 0.2 % Tween), followed by elution 5–8 times with  
16 Elution Buffer (MRB80 [80 mM PIPES-KOH (pH = 6.8), 1 mM EGTA, 4 mM MgCl<sub>2</sub>], 100 mM  
17 KCl, 250 mM imidazole, 2 mM 2-mercaptoethanol, 1 mM ATP). The eluate was subjected to  
18 sucrose gradient sedimentation. Gel filtration chromatography was not used because the  
19 procedure caused protein loss due to unknown reasons. A 2.5–40 % sucrose gradient was made  
20 with 2 mL buffer (MRB80, 100 mM KCl, 0.1 mM ATP, 1mM DTT, sucrose) in a 2.2 mL, 11 × 35  
21 mm ultracentrifugation tube (Beckman Coulter, # 347357). Protein solution (200 µL) was applied  
22 and centrifuged with a TLS-55 rotor (214,000 × g, 4 h, 4°C), and 16 fractions were collected.  
23 Fractions containing Klp67A-GFP-6His were identified with SDS-PAGE and Coomassie staining,  
24 followed by flash freezing. The tail-less Klp67A [1–612 a.a.]-GFP-6His and motor-alone Klp67A  
25 [1–359 a.a.]-GFP-6His were purified in a manner identical to full-length Klp67A-GFP-6His,  
26 except that the gradient sedimentation step was omitted and the buffer was exchanged instead to  
27 MRB80 containing 100 mM KCl, 20 % sucrose, 0.1 mM ATP, and 1 mM DTT, using the  
28 desalting column PD MiniTrap G-25 (GE Healthcare). The solution was flash frozen with liquid  
29 nitrogen and stored at -80 °C. 6His-Klp10A was purified with Ni-NTA, as previously described  
30 (Moriwaki and Goshima, 2016).

#### 32 *Sucrose gradient sedimentation of the Klp67A-tubulin complex*

33 Purified Klp67A-GFP-6His (~2 µM) solution was dialysed with Tube-O-DIALYZE, Micro, 8K  
34 MWCO (TaKaRa) in MRB80 containing 75 mM KCl, 5 % sucrose, 0.1 mM ATP, 1mM DTT for  
35 6 h at 4 °C. The dialysed Klp67A was mixed with 4 µM pig tubulin, 1 mM ATP, and 1mM GTP,  
36 and incubated for 10 min at room temperature. The mixed solution was loaded into sucrose  
37 gradient buffer (MRB80, 75 mM KCl, 1 mM ATP, 1mM GTP, 1mM DTT, sucrose) to make 5–  
38 30 % sucrose gradient in a 2.2 mL, 11 × 35 mm ultracentrifugation tube and centrifuged with  
39 TLS-55 rotor (214,000 × g, 5.5 h, 4°C). The sedimented solution was divided into 16 fractions and  
40 the peak fractions were identified with SDS-PAGE and Sypro Ruby Staining.

#### 42 *In vitro MT polymerisation assay*

43 The *in vitro* MT polymerisation assay was performed essentially following a method previously  
44 described (Li et al., 2012; Moriwaki and Goshima, 2016). A silanized coverslip was coated  
45 with anti-biotin (1–5% in 1 × MRB80, Invitrogen), and the nonspecific surface was blocked with  
46 Pluronic F127 (1% in 1 × MRB80, Invitrogen). Biotinylated MT seeds (50–100 µM tubulin mix

1 containing 10% biotinylated pig tubulin and 10% Alexa647-labelled pig tubulin with 1 mM  
2 GMPCPP) were specifically attached to the functionalised surface by biotinylated  
3 tubulin-anti-biotin links. After the chamber was washed with  $1 \times$  MRB80, MT growth was  
4 initiated by flowing 10  $\mu$ M tubulin (containing 80% S2 tubulin and 20% Alexa568-labelled pig  
5 tubulin) and Klp67A-GFP into the assay buffer ( $1 \times$  MRB80, 75 mM KCl, 1 mM GTP, 1 mM  
6 ATP, 0.5 mg/mL  $\kappa$ -casein and 0.1% methylcellulose, 5.5 % sucrose), and an oxygen scavenger  
7 system (50 mM glucose, 400  $\mu$ g/mL glucose-oxidase, 200  $\mu$ g/mL catalase, and 4 mM DTT). The  
8 samples were sealed with candle wax. During experiments, the samples were maintained at  
9 approximately 25°C, and images were collected every 3 s for 15 min using TIRF microscopy. MT  
10 grew from both ends, but only the plus-end dynamics were analysed. MT depolymerisation assay  
11 was conducted in an identical condition, except that no tubulin was included. MT gliding assay was  
12 performed following a previous report (Miki et al., 2015) with slight modification to the buffer.  
13 Briefly, the flow chamber was washed with  $1 \times$  MRB80 and purified kinesin-1 motor (K560-6His)  
14 was flowed into the chamber. After washing with MRB80 containing 0.5 mg/ml k-casein, the  
15 motility buffer ( $1 \times$  MRB80, 75 mM KCl, GMPCPP-stabilized MTs with Alexa 647-labels, 1 mM  
16 ATP, 0.5 mg/ml k-casein and 0.1% methylcellulose, 5% sucrose), with an oxygen scavenger  
17 system [50 mM glucose, 400 mg/ml glucose oxidase, 200 mg/ml catalase and 4 mM dithiothreitol  
18 (DTT)] and 4 nM Klp67A-GFP, was flowed into the chamber. The single kinesin motility assay  
19 was conducted following other publications (Naito and Goshima, 2015) with slight modification to  
20 the buffer. A silanized coverslip was coated with anti-biotin antibody, and a solution containing 1%  
21 pluronic acid was loaded into the chamber. After washing once with  $1 \times$  MRB80,  
22 GMPCPP-stabilised MTs labelled with Alexa 647 and biotin were loaded. After a  $1 \times$  MRB80  
23 wash, Klp67A-GFP was loaded into the chamber with a buffer identical to that used for the *in vitro*  
24 MT polymerisation assay. GFP was bleached for 3 min with 20 mW, 488 nm laser (maximum  
25 power), followed by imaging unbleached GFP with 40% power.

### 27 *Data analysis*

28 MT attachment instability was determined by counting the detachment events over time (monotelic  
29 to unattachment/lateral interaction or syntelic to monotelic conversion), whereas MT attachment  
30 frequency was obtained for monotelically-attached chromosomes. MT plus-end dynamics *in vitro*  
31 were analysed based on kymographs, following others (Moriwaki and Goshima, 2016): catastrophe  
32 frequency was determined by dividing the number of shrinkage events by the sum of growth and  
33 pause times, whereas the transition from shrinkage to pause or growth was considered a rescue  
34 event and the rescue frequency (for shrinkage time) was calculated. When MTs did not grow or  
35 shrink more than two pixels (0.32  $\mu$ m) for five or more frames (15 s), this period was defined as a  
36 pause. Intensity of fluorescent tubulin on GMPCPP-MT was measured with the line tool associated  
37 with Fiji/ImageJ (images acquired at 5 min of time-lapse were used). The obtained value was  
38 divided by the fluorescent intensity of GMPCPP-MT. To investigate the correlation between  
39 Klp67A-GFP intensity at the tip and the growth/shrinkage rate, kymographs were analysed with  
40 the segmented line tool associated with Fiji/ImageJ. At each time point, the maximum GFP  
41 intensity within 5 pixels (0.8  $\mu$ m) around the tip was obtained and, after background intensity  
42 subtraction, the mean GFP intensity during the growth (or shrinkage) was calculated. The plot was  
43 analysed with general linear regression, where GFP intensity and growth/shrinkage rate were used  
44 as explanatory and response variables respectively, and gamma distribution was assumed.  
45 Reciprocal function was used as link function. To make the response variable exclusively positive  
46 values, 0  $\mu$ m/min growth rate was approximated to  $1 \times 10^{-9}$   $\mu$ m/min. The approximate curve was

1 drawn with 95% Wald confidence interval. P values were obtained with likelihood-ratio test. Image  
2 analysis was performed with Jython scripts associated with Fiji/ImageJ. Further statistical analysis  
3 and data visualizations were performed on R or Prism.

## 4 **Acknowledgements**

5 We thank Kosuke Ariga for helping data analysis, Tomoko Nishiyama for technical support,  
6 Tomomi Kiyomitsu for valuable comments on the manuscript, and Elsa Tungadi for proofreading.  
7 This work was funded by JSPS KAKENHI (15KT0077, 17H01431) and Laura and Arthur Colwin  
8 Endowed Summer Research Fellowship Fund (2015) of the Marine Biological Laboratory to G.G.  
9 T.E. is a recipient of a JSPS pre-doctoral fellowship (16J02807).

## 11 **Author contributions**

12 T.E. and G.G. conceived and designed the research project. T.E. performed most of the  
13 experiments and analysed the data. G.G. performed some experiments, analysed the data, and  
14 wrote the paper.

## 16 **References**

- 17  
18  
19 Al-Bassam, J., H. Kim, G. Brouhard, A. van Oijen, S.C. Harrison, and F. Chang. 2010. CLASP promotes microtubule  
20 rescue by recruiting tubulin dimers to the microtubule. *Dev Cell*. 19:245-258.
- 21 Basto, R., F. Scaerou, S. Mische, E. Wojcik, C. Lefebvre, R. Gomes, T. Hays, and R. Kares. 2004. In vivo dynamics  
22 of the rough deal checkpoint protein during Drosophila mitosis. *Curr Biol*. 14:56-61.
- 23 Bettencourt-Dias, M., and G. Goshima. 2009. RNAi in Drosophila S2 cells as a tool for studying cell cycle progression.  
24 *Methods Mol Biol*. 545:39-62.
- 25 Buster, D.W., D. Zhang, and D.J. Sharp. 2007. Poleward tubulin flux in spindles: regulation and function in mitotic  
26 cells. *Mol Biol Cell*. 18:3094-3104.
- 27 Cheeseman, I.M., S. Anderson, M. Jwa, E.M. Green, J. Kang, J.R. Yates, 3rd, C.S. Chan, D.G. Drubin, and G. Barnes.  
28 2002. Phospho-regulation of kinetochore-microtubule attachments by the Aurora kinase Ipl1p. *Cell*.  
29 111:163-172.
- 30 Cheeseman, I.M., J.S. Chappie, E.M. Wilson-Kubalek, and A. Desai. 2006. The conserved KMN network constitutes  
31 the core microtubule-binding site of the kinetochore. *Cell*. 127:983-997.
- 32 Cottingham, F.R., and M.A. Hoyt. 1997. Mitotic spindle positioning in *Saccharomyces cerevisiae* is accomplished by  
33 antagonistically acting microtubule motor proteins. *J Cell Biol*. 138:1041-1053.
- 34 De Wever, V., I. Nasa, D. Chamouset, D. Lloyd, M. Nimick, H. Xu, L. Trinkle-Mulcahy, and G.B. Moorhead. 2014.  
35 The human mitotic kinesin KIF18A binds protein phosphatase 1 (PP1) through a highly conserved docking  
36 motif. *Biochem Biophys Res Commun*. 453:432-437.
- 37 DeLuca, J.G., W.E. Gall, C. Ciferri, D. Cimini, A. Musacchio, and E.D. Salmon. 2006. Kinetochore microtubule  
38 dynamics and attachment stability are regulated by Hec1. *Cell*. 127:969-982.
- 39 Dick, A.E., and D.W. Gerlich. 2013. Kinetic framework of spindle assembly checkpoint signalling. *Nat Cell Biol*.  
40 15:1370-1377.
- 41 Du, Y., C.A. English, and R. Ohi. 2010. The kinesin-8 Kif18A dampens microtubule plus-end dynamics. *Curr Biol*.  
42 20:374-380.
- 43 Erent, M., D.R. Drummond, and R.A. Cross. 2012. *S. pombe* kinesins-8 promote both nucleation and catastrophe of  
44 microtubules. *PLoS One*. 7:e30738.
- 45 Gandhi, R., S. Bonaccorsi, D. Wentworth, S. Doxsey, M. Gatti, and A. Pereira. 2004. The Drosophila kinesin-like  
46 protein KLP67A is essential for mitotic and male meiotic spindle assembly. *Mol Biol Cell*. 15:121-131.

- 1 Garcia, M.A., L. Vardy, N. Koonruga, and T. Toda. 2001. Fission yeast ch-TOG/XMAP215 homologue Alp14  
2 connects mitotic spindles with the kinetochore and is a component of the Mad2-dependent spindle checkpoint.  
3 *EMBO J.* 20:3389-3401.
- 4 Gatt, M.K., M.S. Savoian, M.G. Riparbelli, C. Massarelli, G. Callaini, and D.M. Glover. 2005. Klp67A destabilises  
5 pre-anaphase microtubules but subsequently is required to stabilise the central spindle. *J Cell Sci.*  
6 118:2671-2682.
- 7 Gluszek, A.A., C.F. Cullen, W. Li, R.A. Battaglia, S.J. Radford, M.F. Costa, K.S. McKim, G. Goshima, and H. Ohkura.  
8 2015. The microtubule catastrophe promoter Sentin delays stable kinetochore-microtubule attachment in  
9 oocytes. *J Cell Biol.* 211:1113-1120.
- 10 Goshima, G., M. Mayer, N. Zhang, N. Stuurman, and R.D. Vale. 2008. Augmin: a protein complex required for  
11 centrosome-independent microtubule generation within the spindle. *J Cell Biol.* 181:421-429.
- 12 Goshima, G., and R.D. Vale. 2003. The roles of microtubule-based motor proteins in mitosis: comprehensive RNAi  
13 analysis in the Drosophila S2 cell line. *J Cell Biol.* 162:1003-1016.
- 14 Goshima, G., and R.D. Vale. 2005. Cell cycle-dependent dynamics and regulation of mitotic kinesins in Drosophila S2  
15 cells. *Mol Biol Cell.* 16:3896-3907.
- 16 Goshima, G., R. Wollman, N. Goodwin, J.M. Zhang, J.M. Scholey, R.D. Vale, and N. Stuurman. 2007. Genes required  
17 for mitotic spindle assembly in Drosophila S2 cells. *Science.* 316:417-421.
- 18 Goshima, G., R. Wollman, N. Stuurman, J.M. Scholey, and R.D. Vale. 2005. Length control of the metaphase spindle.  
19 *Curr Biol.* 15:1979-1988.
- 20 Gupta, M.L., Jr., P. Carvalho, D.M. Roof, and D. Pellman. 2006. Plus end-specific depolymerase activity of Kip3, a  
21 kinesin-8 protein, explains its role in positioning the yeast mitotic spindle. *Nat Cell Biol.* 8:913-923.
- 22 Hitti, E., T. Bakheet, N. Al-Souhibani, W. Moghrabi, S. Al-Yahya, M. Al-Ghamdi, M. Al-Saif, M.M. Shoukri, A.  
23 Lanczky, R. Grepin, B. Gyorffy, G. Pages, and K.S. Khabar. 2016. Systematic Analysis of AU-Rich Element  
24 Expression in Cancer Reveals Common Functional Clusters Regulated by Key RNA-Binding Proteins.  
25 *Cancer Res.* 76:4068-4080.
- 26 Ito, A., and G. Goshima. 2015. Microcephaly protein Asp focuses the minus ends of spindle microtubules at the pole  
27 and within the spindle. *J Cell Biol.* 211:999-1009.
- 28 Janssen, L.M.E., T.V. Averink, V.A. Blomen, T.R. Brummelkamp, R.H. Medema, and J.A. Raaijmakers. 2018. Loss  
29 of Kif18A Results in Spindle Assembly Checkpoint Activation at Microtubule-Attached Kinetochores. *Curr*  
30 *Biol.* 28:2685-2696 e2684.
- 31 Joglekar, A.P. 2016. A Cell Biological Perspective on Past, Present and Future Investigations of the Spindle Assembly  
32 Checkpoint. *Biology (Basel).* 5.
- 33 Kern, D.M., J.K. Monda, K.C. Su, E.M. Wilson-Kubalek, and I.M. Cheeseman. 2017. Astrin-SKAP complex  
34 reconstitution reveals its kinetochore interaction with microtubule-bound Ndc80. *Elife.* 6.
- 35 Kim, H., and J.K. Stumpff. 2018. Kif18A promotes Hec1 dephosphorylation to coordinate chromosome alignment  
36 with kinetochore microtubule attachment. *bioRxiv.* 304147.
- 37 Lampson, M.A., and E.L. Grishchuk. 2017. Mechanisms to Avoid and Correct Erroneous Kinetochore-Microtubule  
38 Attachments. *Biology (Basel).* 6.
- 39 Li, W., T. Moriwaki, T. Tani, T. Watanabe, K. Kaibuchi, and G. Goshima. 2012. Reconstitution of dynamic  
40 microtubules with Drosophila XMAP215, EB1, and Sentin. *J Cell Biol.* 199:849-862.
- 41 Locke, J., A.P. Joseph, A. Pena, M.M. Mockel, T.U. Mayer, M. Topf, and C.A. Moores. 2017. Structural basis of  
42 human kinesin-8 function and inhibition. *Proc Natl Acad Sci U S A.* 114:E9539-E9548.
- 43 Maiato, H., E.A. Fairley, C.L. Rieder, J.R. Swedlow, C.E. Sunkel, and W.C. Earnshaw. 2003. Human CLASP1 is an  
44 outer kinetochore component that regulates spindle microtubule dynamics. *Cell.* 113:891-904.
- 45 Maiato, H., A. Khodjakov, and C.L. Rieder. 2005. Drosophila CLASP is required for the incorporation of microtubule  
46 subunits into fluxing kinetochore fibres. *Nat Cell Biol.* 7:42-47.

- 1 Mayr, M.I., S. Hummer, J. Bormann, T. Gruner, S. Adio, G. Woehlke, and T.U. Mayer. 2007. The human kinesin  
2 Kif18A is a motile microtubule depolymerase essential for chromosome congression. *Curr Biol.* 17:488-498.
- 3 Mayr, M.I., M. Storch, J. Howard, and T.U. Mayer. 2011. A non-motor microtubule binding site is essential for the  
4 high processivity and mitotic function of kinesin-8 Kif18A. *PLoS One.* 6:e27471.
- 5 McHugh, T., A.A. Gluszek, and J.P.I. Welburn. 2018. Microtubule end tethering of a processive kinesin-8 motor  
6 Kif18b is required for spindle positioning. *J Cell Biol.*
- 7 Miki, T., M. Nishina, and G. Goshima. 2015. RNAi screening identifies the armadillo repeat-containing kinesins  
8 responsible for microtubule-dependent nuclear positioning in *Physcomitrella patens*. *Plant Cell Physiol.*  
9 56:737-749.
- 10 Moriwaki, T., and G. Goshima. 2016. Five factors can reconstitute all three phases of microtubule polymerization  
11 dynamics. *J Cell Biol.* 215:357-368.
- 12 Musacchio, A., and A. Desai. 2017. A Molecular View of Kinetochore Assembly and Function. *Biology (Basel).* 6.
- 13 Naito, H., and G. Goshima. 2015. NACK kinesin is required for metaphase chromosome alignment and cytokinesis in  
14 the moss *Physcomitrella patens*. *Cell Struct Funct.* 40:31-41.
- 15 Powers, A.F., A.D. Franck, D.R. Gestaut, J. Cooper, B. Graczyk, R.R. Wei, L. Wordeman, T.N. Davis, and C.L.  
16 Asbury. 2009. The Ndc80 kinetochore complex forms load-bearing attachments to dynamic microtubule tips  
17 via biased diffusion. *Cell.* 136:865-875.
- 18 Rogers, G.C., S.L. Rogers, T.A. Schwimmer, S.C. Ems-McClung, C.E. Walczak, R.D. Vale, J.M. Scholey, and D.J.  
19 Sharp. 2004. Two mitotic kinesins cooperate to drive sister chromatid separation during anaphase. *Nature.*  
20 427:364-370.
- 21 Savoian, M.S., M.K. Gatt, M.G. Riparbelli, G. Callaini, and D.M. Glover. 2004. *Drosophila* Klp67A is required for  
22 proper chromosome congression and segregation during meiosis I. *J Cell Sci.* 117:3669-3677.
- 23 Savoian, M.S., and D.M. Glover. 2010. *Drosophila* Klp67A binds prophase kinetochores to subsequently regulate  
24 congression and spindle length. *J Cell Sci.* 123:767-776.
- 25 Schmidt, J.C., H. Arthanari, A. Boeszoermyeni, N.M. Dashkevich, E.M. Wilson-Kubalek, N. Monnier, M. Markus, M.  
26 Oberer, R.A. Milligan, M. Bathe, G. Wagner, E.L. Grishchuk, and I.M. Cheeseman. 2012. The  
27 kinetochore-bound Skl1 complex tracks depolymerizing microtubules and binds to curved protofilaments.  
28 *Dev Cell.* 23:968-980.
- 29 Smurnyy, Y., A.V. Toms, G.R. Hickson, M.J. Eck, and U.S. Eggert. 2010. Binucleine 2, an isoform-specific inhibitor  
30 of *Drosophila* Aurora B kinase, provides insights into the mechanism of cytokinesis. *ACS Chem Biol.*  
31 5:1015-1020.
- 32 Straight, A.F., J.W. Sedat, and A.W. Murray. 1998. Time-lapse microscopy reveals unique roles for kinesins during  
33 anaphase in budding yeast. *J Cell Biol.* 143:687-694.
- 34 Stumpff, J., Y. Du, C.A. English, Z. Maliga, M. Wagenbach, C.L. Asbury, L. Wordeman, and R. Ohi. 2011. A  
35 tethering mechanism controls the processivity and kinetochore-microtubule plus-end enrichment of the  
36 kinesin-8 Kif18A. *Mol Cell.* 43:764-775.
- 37 Stumpff, J., G. von Dassow, M. Wagenbach, C. Asbury, and L. Wordeman. 2008. The kinesin-8 motor Kif18A  
38 suppresses kinetochore movements to control mitotic chromosome alignment. *Dev Cell.* 14:252-262.
- 39 Stumpff, J., M. Wagenbach, A. Franck, C.L. Asbury, and L. Wordeman. 2012. Kif18A and chromokinesins confine  
40 centromere movements via microtubule growth suppression and spatial control of kinetochore tension. *Dev*  
41 *Cell.* 22:1017-1029.
- 42 Su, X., H. Arellano-Santoyo, D. Portran, J. Gaillard, M. Vantard, M. Thery, and D. Pellman. 2013. Microtubule-sliding  
43 activity of a kinesin-8 promotes spindle assembly and spindle-length control. *Nat Cell Biol.* 15:948-957.
- 44 Su, X., W. Qiu, M.L. Gupta, Jr., J.B. Pereira-Leal, S.L. Reck-Peterson, and D. Pellman. 2011. Mechanisms underlying  
45 the dual-mode regulation of microtubule dynamics by Kip3/kinesin-8. *Mol Cell.* 43:751-763.
- 46 Tanenbaum, M.E., L. Macurek, A. Janssen, E.F. Geers, M. Alvarez-Fernandez, and R.H. Medema. 2009. Kif15

1 cooperates with eg5 to promote bipolar spindle assembly. *Curr Biol.* 19:1703-1711.  
2 Tien, J.F., N.T. Umbreit, D.R. Gestaut, A.D. Franck, J. Cooper, L. Wordeman, T. Gonen, C.L. Asbury, and T.N. Davis.  
3 2010. Cooperation of the Dam1 and Ndc80 kinetochore complexes enhances microtubule coupling and is  
4 regulated by aurora B. *J Cell Biol.* 189:713-723.  
5 Tytell, J.D., and P.K. Sorger. 2006. Analysis of kinesin motor function at budding yeast kinetochores. *J Cell Biol.*  
6 172:861-874.  
7 Varga, V., J. Helenius, K. Tanaka, A.A. Hyman, T.U. Tanaka, and J. Howard. 2006. Yeast kinesin-8 depolymerizes  
8 microtubules in a length-dependent manner. *Nat Cell Biol.* 8:957-962.  
9 Varga, V., C. Leduc, V. Bormuth, S. Diez, and J. Howard. 2009. Kinesin-8 motors act cooperatively to mediate  
10 length-dependent microtubule depolymerization. *Cell.* 138:1174-1183.  
11 Wang, H., I. Brust-Mascher, D. Cheerambathur, and J.M. Scholey. 2010. Coupling between microtubule sliding,  
12 plus-end growth and spindle length revealed by kinesin-8 depletion. *Cytoskeleton (Hoboken).* 67:715-728.  
13 Wargacki, M.M., J.C. Tay, E.G. Muller, C.L. Asbury, and T.N. Davis. 2010. Kip3, the yeast kinesin-8, is required for  
14 clustering of kinetochores at metaphase. *Cell Cycle.* 9:2581-2588.  
15 Weaver, L.N., S.C. Ems-McClung, J.R. Stout, C. LeBlanc, S.L. Shaw, M.K. Gardner, and C.E. Walczak. 2011.  
16 Kif18A uses a microtubule binding site in the tail for plus-end localization and spindle length regulation. *Curr*  
17 *Biol.* 21:1500-1506.  
18 West, R.R., T. Malmstrom, and J.R. McIntosh. 2002. Kinesins klp5(+) and klp6(+) are required for normal  
19 chromosome movement in mitosis. *J Cell Sci.* 115:931-940.  
20 Widlund, P.O., M. Podolski, S. Reber, J. Alper, M. Storch, A.A. Hyman, J. Howard, and D.N. Drechsel. 2012.  
21 One-step purification of assembly-competent tubulin from diverse eukaryotic sources. *Mol Biol Cell.*  
22 23:4393-4401.  
23 Yu, N., L. Signorile, S. Basu, S. Ottema, J.H. Lebbink, K. Leslie, I. Smal, D. Dekkers, J. Demmers, and N. Galjart.  
24 2016. Isolation of functional tubulin dimers and of tubulin-associated proteins from mammalian cells. *Curr*  
25 *Biol.* 26:1728-1736.  
26 Zhang, C., C. Zhu, H. Chen, L. Li, L. Guo, W. Jiang, and S.H. Lu. 2010. Kif18A is involved in human breast  
27 carcinogenesis. *Carcinogenesis.* 31:1676-1684.

28

## 29 Supplemental Movie Legends

30

### 31 **Movie 1. Processive motility and plus-end-accumulation of kinesin-8<sup>Klp67A</sup>**

32 Kinesin-8<sup>Klp67A</sup>-GFP was imaged every 1 s with TIRF microscopy. We first illuminated the  
33 imaging field for ~3 min with high laser power to bleach most, if not all, kinesin-8<sup>Klp67A</sup>-GFP at  
34 the microtubule end, and then restarted time-lapse imaging with a normal laser power. Bar, 5  $\mu$ m.

35

### 36 **Movie 2. MT attachment stability in the monopolar spindle in the presence or absence of** 37 **kinesin-8<sup>Klp67A</sup>**

38 GFP-Rod (green), H2B-mCherry (blue), and SiR-tubulin (magenta) images were acquired every 3  
39 s with spinning-disc confocal microscopy in kinesin-5<sup>Klp61F</sup> single or kinesin-8<sup>Klp67A</sup>/kinesin-5<sup>Klp61F</sup>  
40 double RNAi-treated cells. Bar, 5  $\mu$ m.

41

### 42 **Movie 3. MT attachment stability in the bipolar spindle in the presence or absence of** 43 **kinesin-8<sup>Klp67A</sup>**

44 GFP-Rod (green), H2B-mCherry (blue), and SiR-tubulin (magenta) images were acquired every 3  
45 s with spinning-disc confocal microscopy in kinesin-8<sup>Klp67A</sup> or control RNAi-treated cells. Bar, 5  
46  $\mu$ m.

1

2 **Movie 4. MT attachment stability in the absence of augmin<sup>Dgt6</sup>**

3 GFP-Rod (green), H2B-mCherry (blue), and SiR-tubulin (magenta) images were acquired every 3  
4 s with spinning-disc confocal microscopy in augmin<sup>Dgt6</sup>/kinesin-5<sup>Klp61F</sup> RNAi-treated cells. Bar, 5  
5  $\mu$ m.

6

7 **Movie 5. Stable syntelic attachment in the monopolar spindle after Aurora B inhibition in  
8 the absence of kinesin-8<sup>Klp67A</sup>**

9 GFP-Rod (green), H2B-mCherry (blue), and SiR-tubulin (magenta) images were acquired every 3  
10 s with spinning-disc confocal microscopy in augmin<sup>Dgt6</sup>/kinesin-5<sup>Klp61F</sup> RNAi-treated cells.  
11 Twenty  $\mu$ M Binucleine 2 (*Drosophila* Aurora B inhibitor) or control DMSO was added at time 0.  
12 Bar, 5  $\mu$ m.

13

14 **Movie 6. CLASP<sup>Mast/Orbit</sup> overexpression rescued MT attachment stability in the absence of  
15 kinesin-8<sup>Klp67A</sup>**

16 GFP-Rod (green), GFP-CLASP<sup>Mast/Orbit</sup> (green), H2B-mCherry (blue), and SiR-tubulin (magenta)  
17 images were acquired every 3 s with spinning-disc confocal microscopy in  
18 kinesin-8<sup>Klp67A</sup>/kinesin-5<sup>Klp61F</sup> double RNAi-treated cells expressing GFP-CLASP<sup>Mast/Orbit</sup>. Bar, 5  
19  $\mu$ m.

20

21 **Movie 7. GFP-Mad2 dynamics in the monopolar spindle after KIF18A RNAi in HeLa cells**

22 GFP-Mad2 (green) and SiR-tubulin (magenta) images were acquired every 4 s with spinning-disc  
23 confocal microscopy in kinesin-8<sup>KIF18A</sup> and control RNAi-treated cells that were treated with  
24 STLC, an inhibitor of kinesin-5<sup>Eg5</sup>. Nine randomly selected cells are displayed for each sample.  
25 Areas devoid of fluorescence represent chromosomes. Neither of the authors could identify any  
26 phenotype associated with kinesin-8<sup>KIF18A</sup> depletion. Bar, 5  $\mu$ m.

27

28 **Table S1. Plasmids used in this study**

| Name          | Insert                       | Vector  | Note                        |
|---------------|------------------------------|---------|-----------------------------|
| pED128        | Klp67A[full-length]-GFP-6His | pET23   |                             |
| pED182        | Klp67A[1-612a.a.]-GFP-6His   | pET23   |                             |
| pED183        | Klp67A[1-359a.a.]-GFP-6His   | pET23   |                             |
| pGG952        | 6His-Klp10A                  | pDEST17 | Moriwaki and Goshima (2016) |
| pED158        | sfGFP-Rod                    | pAc     |                             |
| pGFP-CLASP    | GFP-Mast/Orbit               | pMT     | Goshima et al. (2007)       |
| pGG482        | H2B-mCherry                  | pAc     |                             |
| pED309        | EB1-SNAP                     | pAc     |                             |
| pCoHygromycin | HygR                         | Copia   |                             |

29



## Figure 1

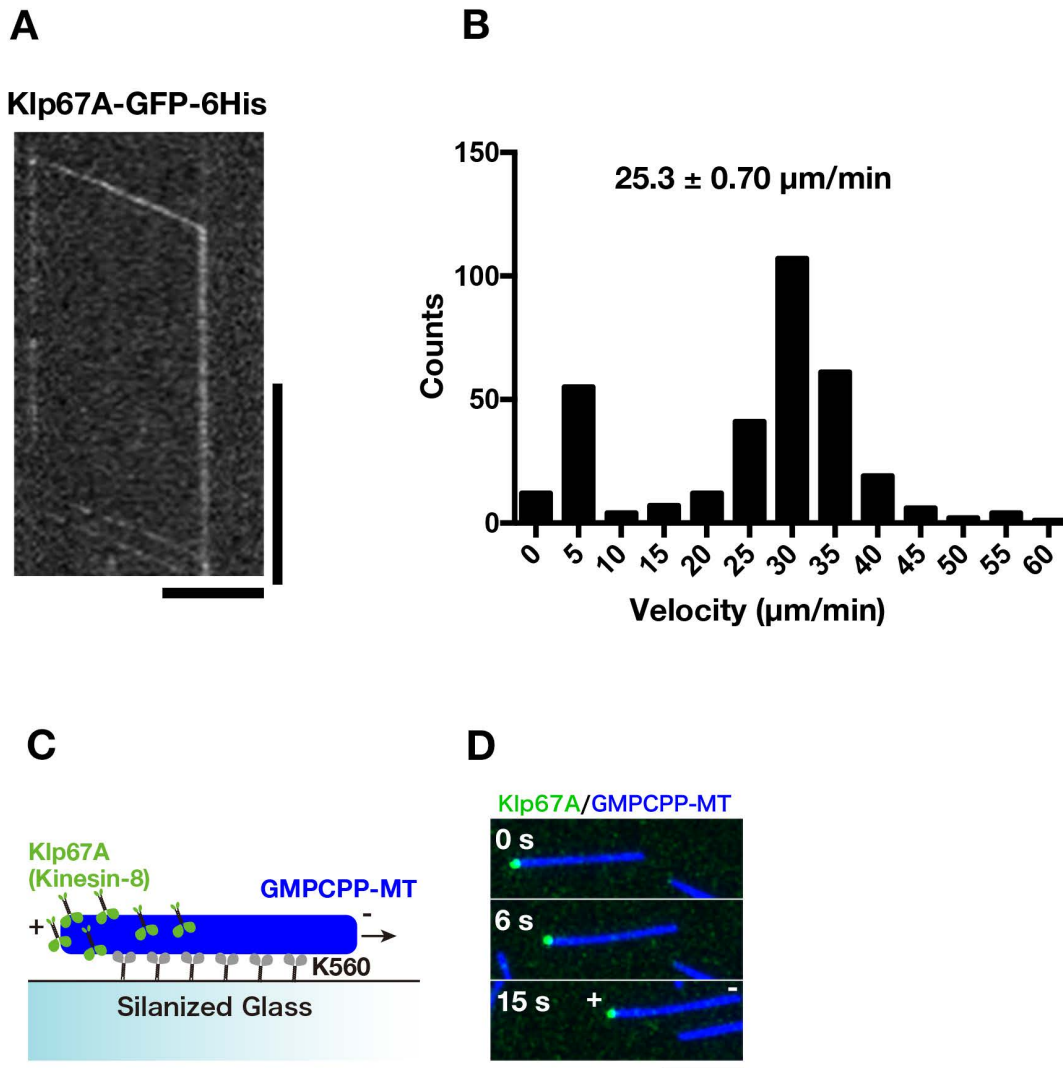

### Figure 1. Kinesin-8<sup>Klp67A</sup> is a processive plus-end-directed motor

(A) Kymograph showing processive motility of kinesin-8<sup>Klp67A</sup>-GFP (100 pM) along MTs and accumulation at the MT end. Kinesin-8<sup>Klp67A</sup>-GFP enriched at the MT end was first photo-bleached, followed by observation of unbleached kinesin-8<sup>Klp67A</sup>-GFP. Horizontal bar, 5 μm; Vertical bar, 20 s. (B) Plot of kinesin-8<sup>Klp67A</sup>-GFP run velocity, calculated based on kymographs (n = 331). Immobile GFP signals were not counted (the “0” column represents velocity between 0 and 5 μm/min). (C, D) Gliding of stabilised MTs (blue) by the plus-end-directed human kinesin-1 motor (K560 construct; non-fluorescent). Rightward motility of MTs indicate that the left end corresponds to MT plus end. Kinesin-8<sup>Klp67A</sup>-GFP (green, 4 nM) accumulated specifically at the plus end.

## Figure 2

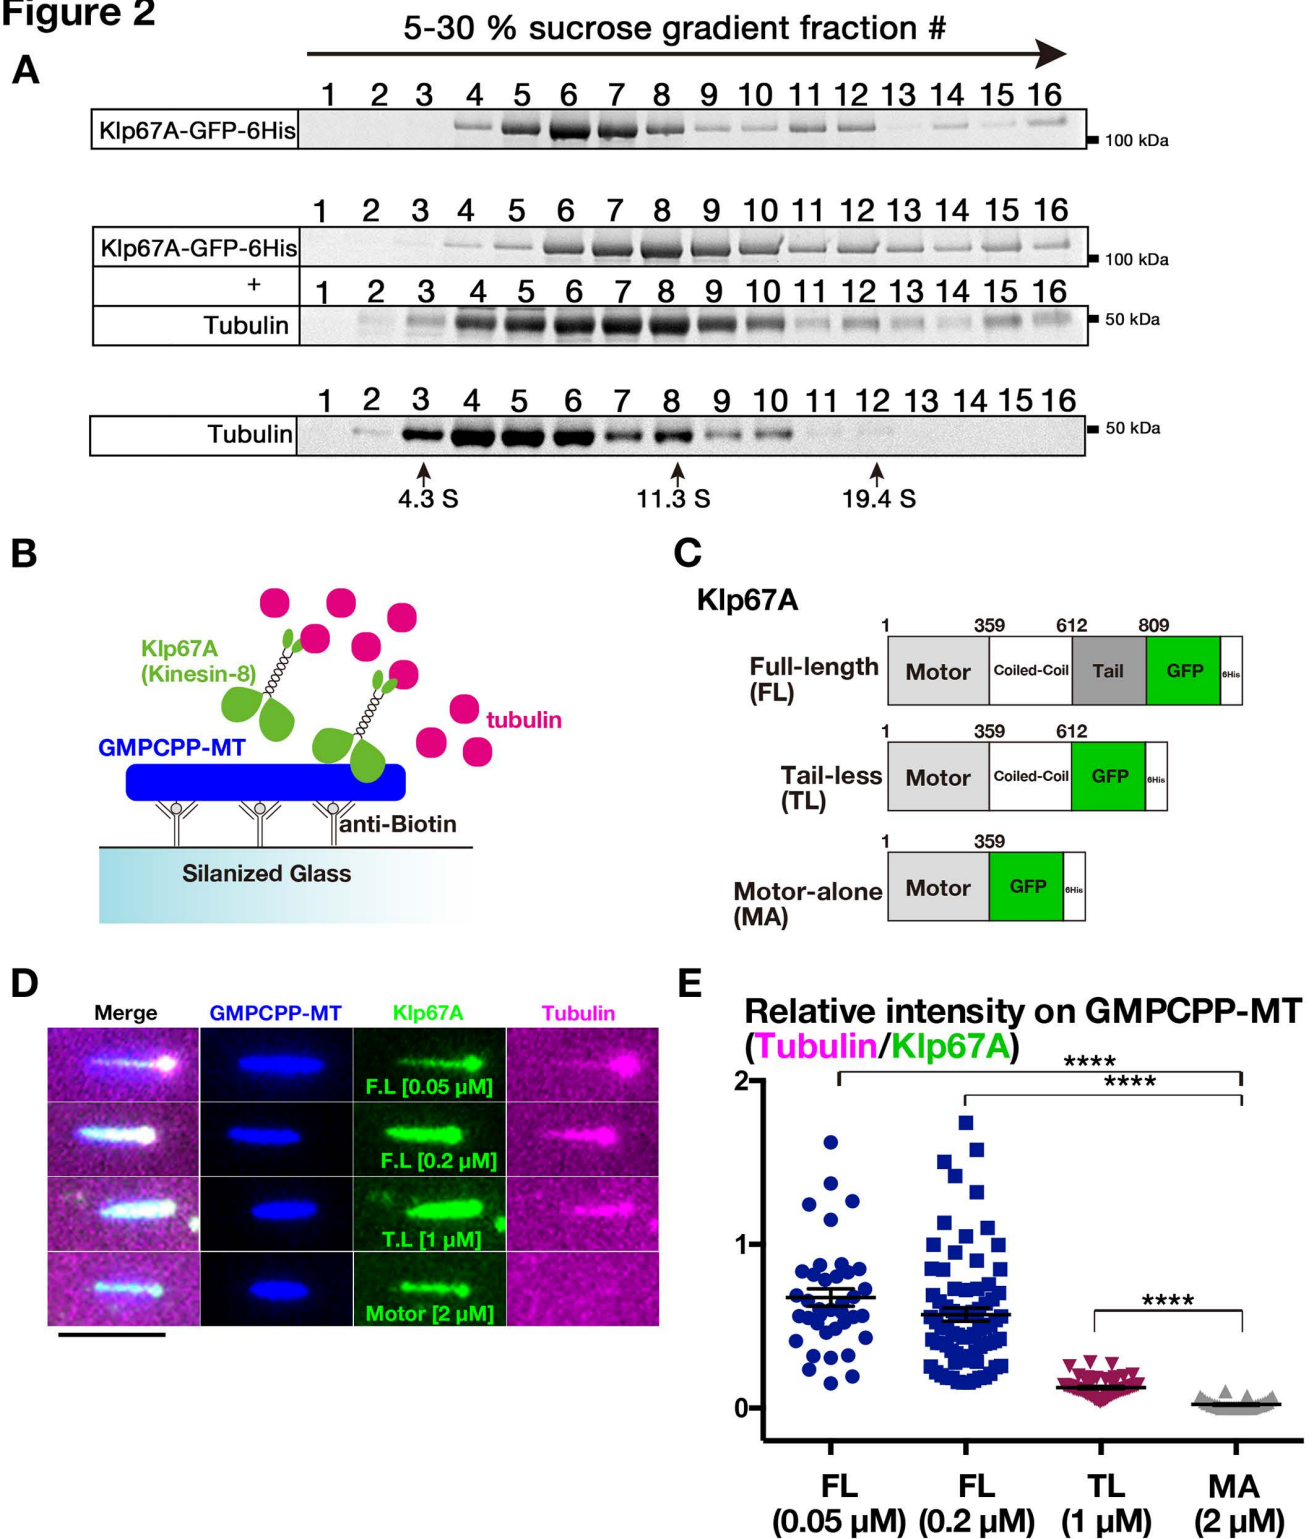

### Figure 2. Tubulin-binding activity of kinesin-8<sup>Klp67A</sup>

(A) Co-fractionation of kinesin-8<sup>Klp67A</sup>-GFP and tubulin after sucrose gradient centrifugation. Each fraction was subjected to SDS-PAGE, followed by staining with Sypro Ruby. (B–D) Tubulin recruitment by kinesin-8<sup>Klp67A</sup>. Tubulin (10 μM, magenta) and kinesin-8<sup>Klp67A</sup> (green; full-length, tail-less [1–612 a.a.], motor-alone [1–359 a.a.]), which bound to GMPCPP-stabilised MTs (blue), were mixed, and tubulin localisation along MTs was investigated. Bar, 5 μm. (E) Quantification of tubulin intensity on the MT seed. Each dot represents a value obtained from a single MT and error bars represent SEM. FL vs. MA:  $p = 3.8 \times 10^{-14}$ , TL vs. MA:  $p = 3.8 \times 10^{-10}$  by Games-Howell test.  $n = 38$  (50 nM) + 77 (200 nM) (full-length), 33 (motor-alone), 58 (tail-less).

### Figure 3

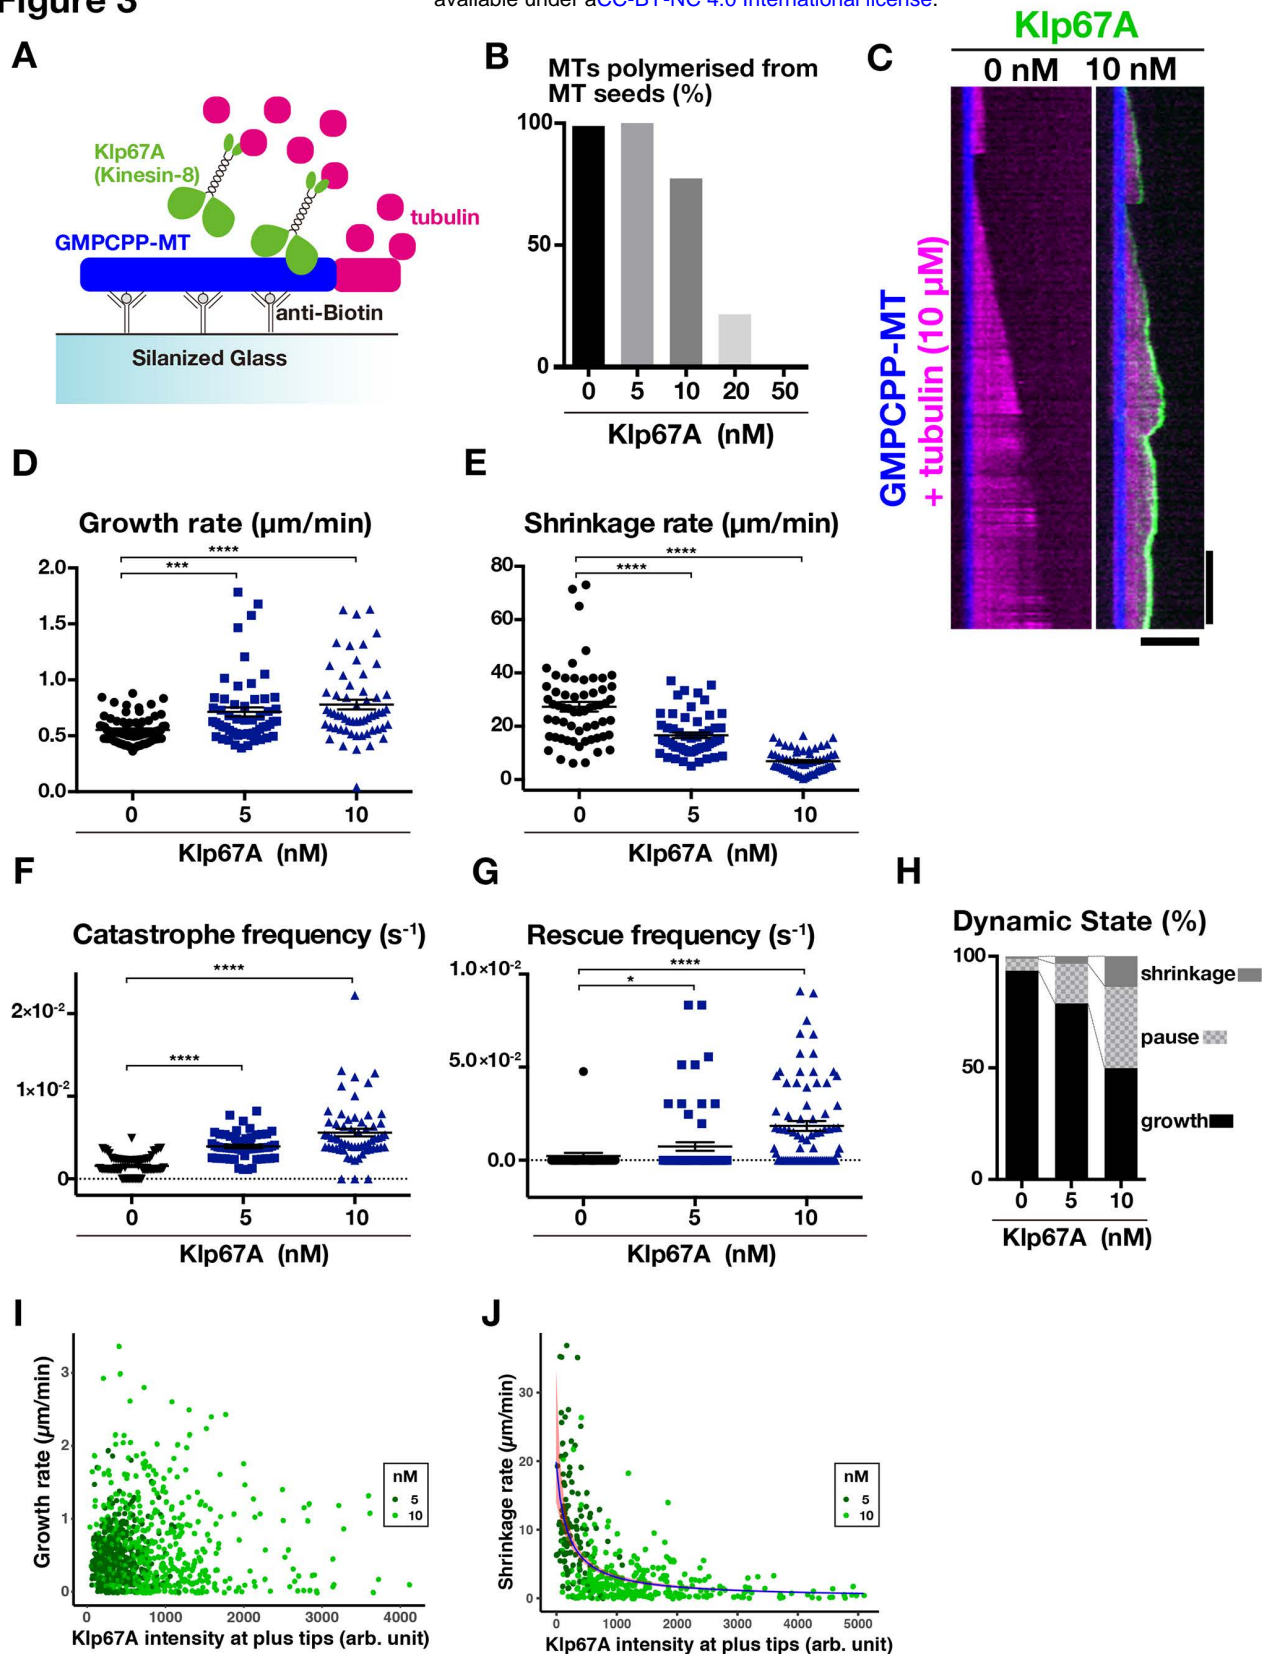

### Figure 3. Kinesin-8<sup>Klp67A</sup> regulates MT plus-end dynamics in vitro

(A) Schematic presentation of the in vitro MT polymerisation assay. (B) Inhibitory effect of kinesin-8<sup>Klp67A</sup> on MT polymerisation from the seed ( $n = 84, 74, 84, 74, 94$  from left to right). (C) MT dynamics are represented by kymographs. MTs stabilised with GMPCPP are coloured blue, dynamics MTs are magenta, and kinesin-8<sup>Klp67A</sup>-GFP (0 or 10 nM) is green. Horizontal bar, 5  $\mu\text{m}$ ; Vertical bar, 120 s. (D–H) Parameters of MT plus end dynamics. Experiments were performed twice and the combined data are displayed (the change in rate/frequency by kinesin-8<sup>Klp67A</sup> was reproduced).  $N = 41 + 33$  (0 nM),  $25 + 31$  (5 nM),  $20 + 41$  (10 nM). Each dot represents a value obtained from a single MT and error bars represent SEM. Note that rescue was rarely observed in the absence of kinesin-8<sup>Klp67A</sup>.  $p < 0.0001$  (\*\*\*\*),  $p < 0.002$  (\*\*\*), or  $p < 0.03$  (\*) by Games-Howell (D–F) or Steel Dwass (G) tests. (I, J) Correlation between the amount of kinesin-8<sup>Klp67A</sup>-GFP at the tip and growth (I;  $n = 397$  [5 nM] and  $494$  [10 nM]) or shrinkage (J;  $n = 116$  [5 nM] and  $293$  [10 nM]) rate. Negative correlation was found for shrinkage rate ( $p < 2 \times 10^{-16}$ , likelihood ratio test).

## Figure 4

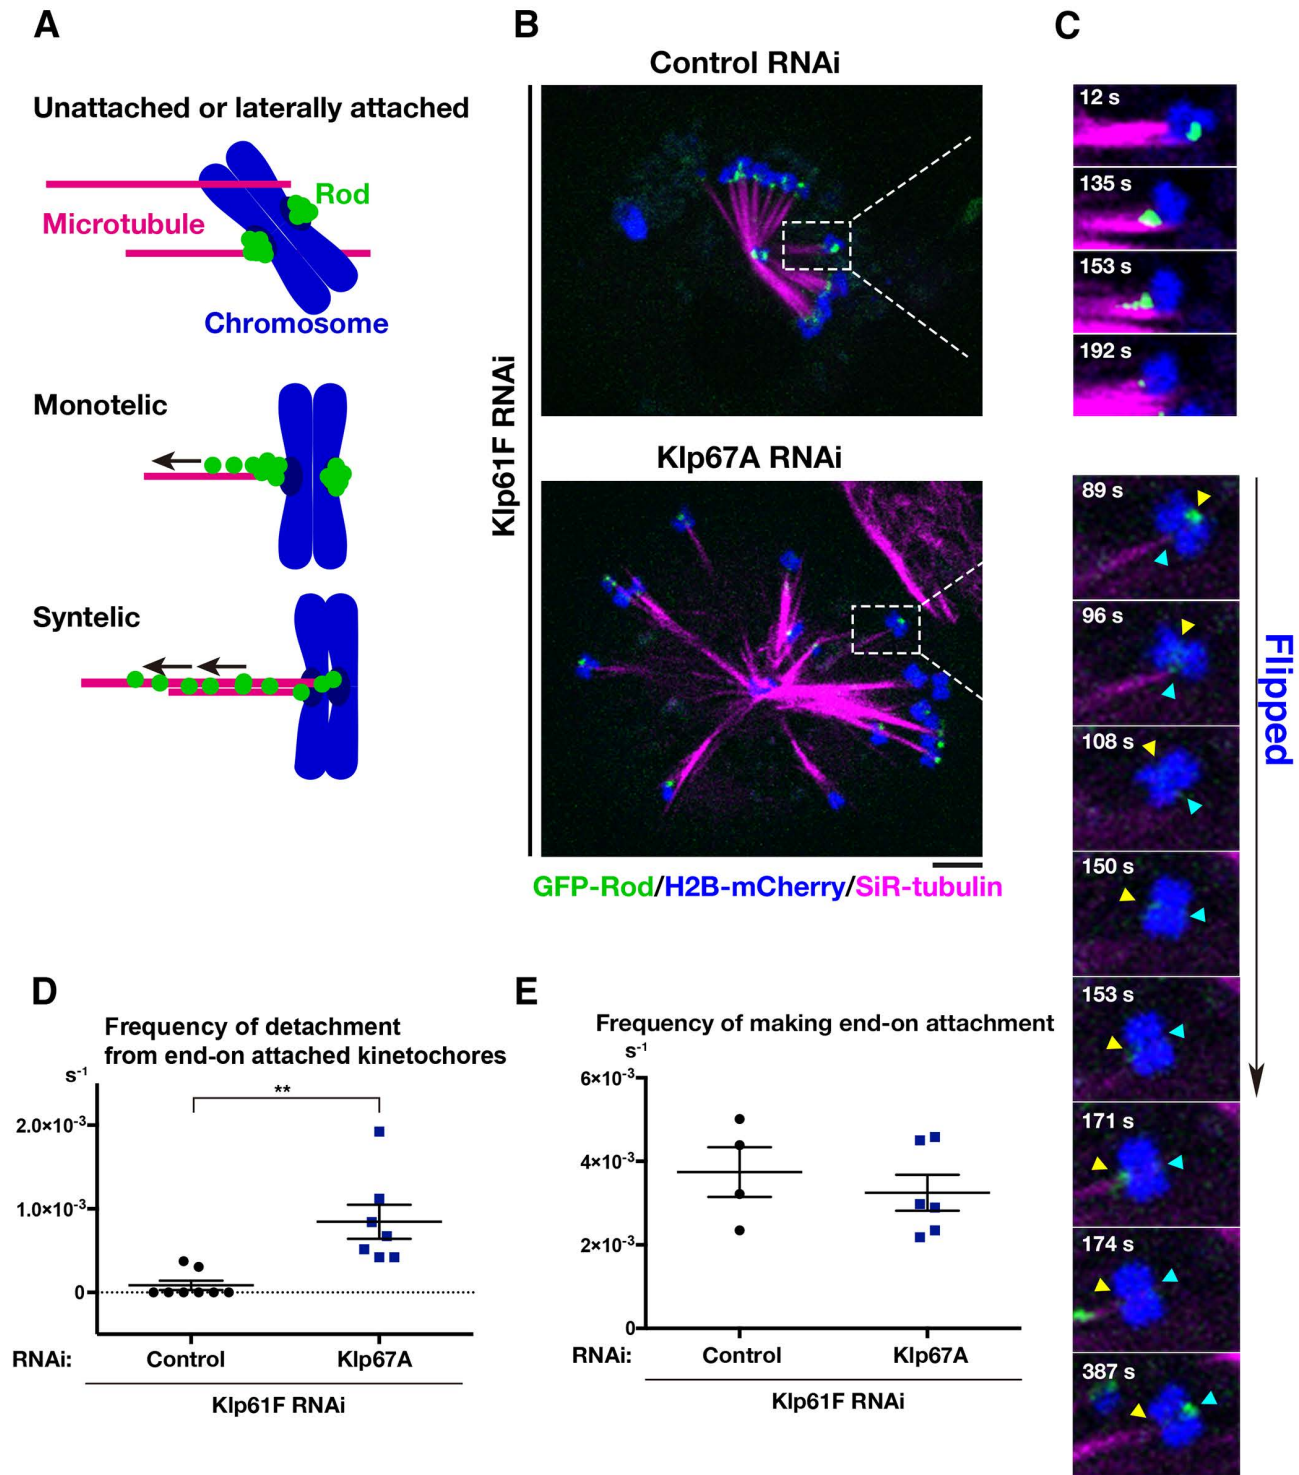

**Figure 4. Kinesin-8<sup>Klp67A</sup> is required for stable kinetochore-MT attachment: monopolar spindle**

(A) Diagram of GFP-Rod and MT attachment mode. (B) Monopolar spindles formed after RNAi of kinesin-5<sup>Klp61F</sup> (top) or double kinesin-5<sup>Klp61F</sup>/ kinesin-8<sup>Klp67A</sup> (bottom). Blue, chromosome (H2B-mCherry); Green, GFP-Rod; Magenta, MT (SiR-tubulin). (C) (Top) Monotelic-to-syntelic conversion in the control monopolar spindle; upon new MT association, GFP-Rod stream was observed along the kinetochore MT (153 s), and subsequently, the GFP signal diminished at the kinetochore (192 s). (Bottom) Chromosome flipping was observed in the absence of kinesin-8<sup>Klp67A</sup> (89–171 s; sister kinetochores are indicated by yellow and blue arrows). Monotelic-to-syntelic conversion was also observed for this chromosome (96 s). (D) Increased frequency (event # per chromosome per sec) of MT detachment in the absence of kinesin-8<sup>Klp67A</sup> ( $p < 0.009$ , Welch's t-test). Events were counted when MTs terminated end-on attachment. RNAi and imaging were performed four times, data were quantitatively analysed twice, and the two datasets were combined. Each dot in the graph represents mean frequency for a cell. A total of 86 chromosomes in 8 cells (control) and 56 chromosomes in 8 cells (kinesin-8<sup>Klp67A</sup> RNAi) were analysed. (E) Frequency (event # per chromosome per sec) of newly acquired end-on attachment that was indicated by GFP-Rod stream along kinetochore MTs. The attachment number was divided by the total time the chromosomes spent in a monotelic or unattached state. Each dot in the graph represents mean frequency for a cell. A total of 18 chromosomes in 4 cells (control) and 18 chromosomes in 6 cells (kinesin-8<sup>Klp67A</sup> RNAi) were analysed. Error bars indicate SEM. Bars, 5  $\mu m$ .

## Figure 5

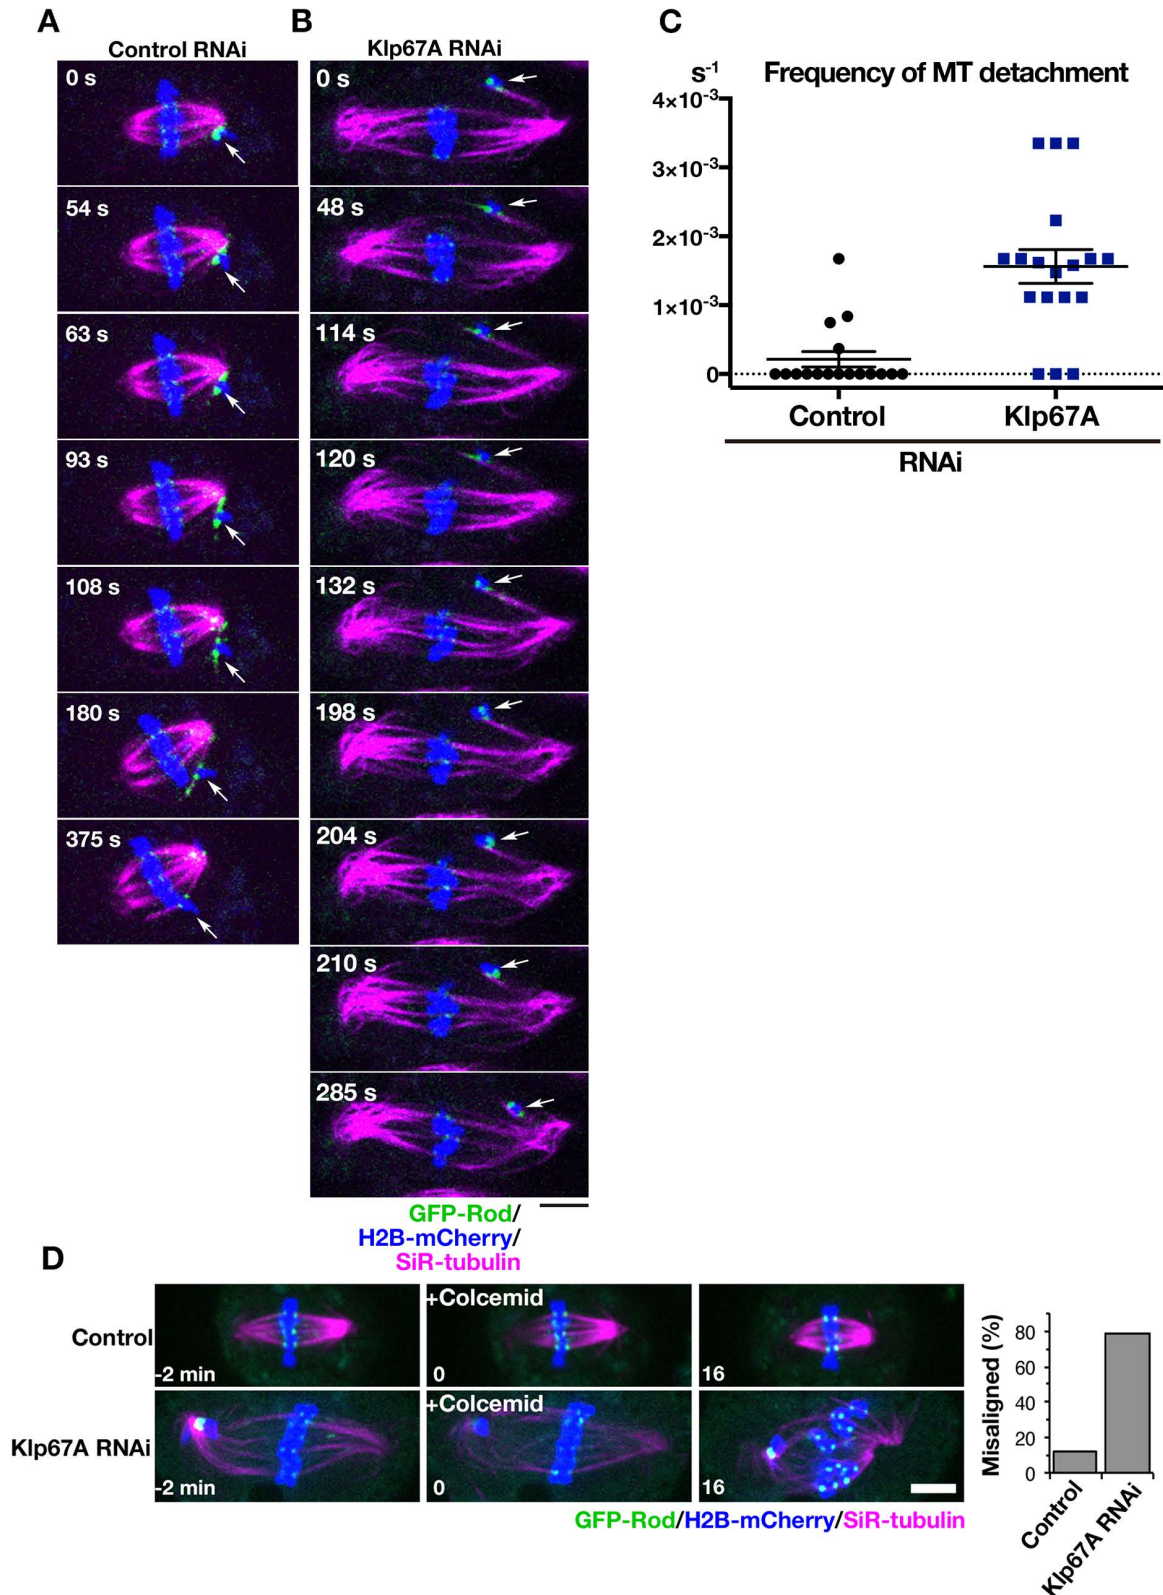

### Figure 5. Kinesin-8<sup>Klp67A</sup> is required for stable kinetochore-MT attachment: bipolar spindle

(A, B) Time-lapse imaging of spindle MTs (magenta; SiR-tubulin staining), chromosomes (blue; H2B-mCherry), and GFP-Rod (green) after control or kinesin-8<sup>Klp67A</sup> RNAi. The behaviour of an initially unaligned chromosome (arrow) was dramatically different. (C) Increased frequency (event # per cell per sec) of MT detachment in the absence of kinesin-8<sup>Klp67A</sup> ( $p < 0.001$ , Welch's t-test). Events were counted when MTs terminated end-on attachment. RNAi and imaging were performed 3 times, data were quantitatively analysed twice, and the two datasets were combined. Error bars represent SEM. (D) Sensitivity to MT depolymerisation. One or more chromosomes at the metaphase plate became unaligned upon colcemid treatment at much higher frequency in the absence of kinesin-8<sup>Klp67A</sup>. Bars, 5  $\mu\text{m}$ .



## Figure 7

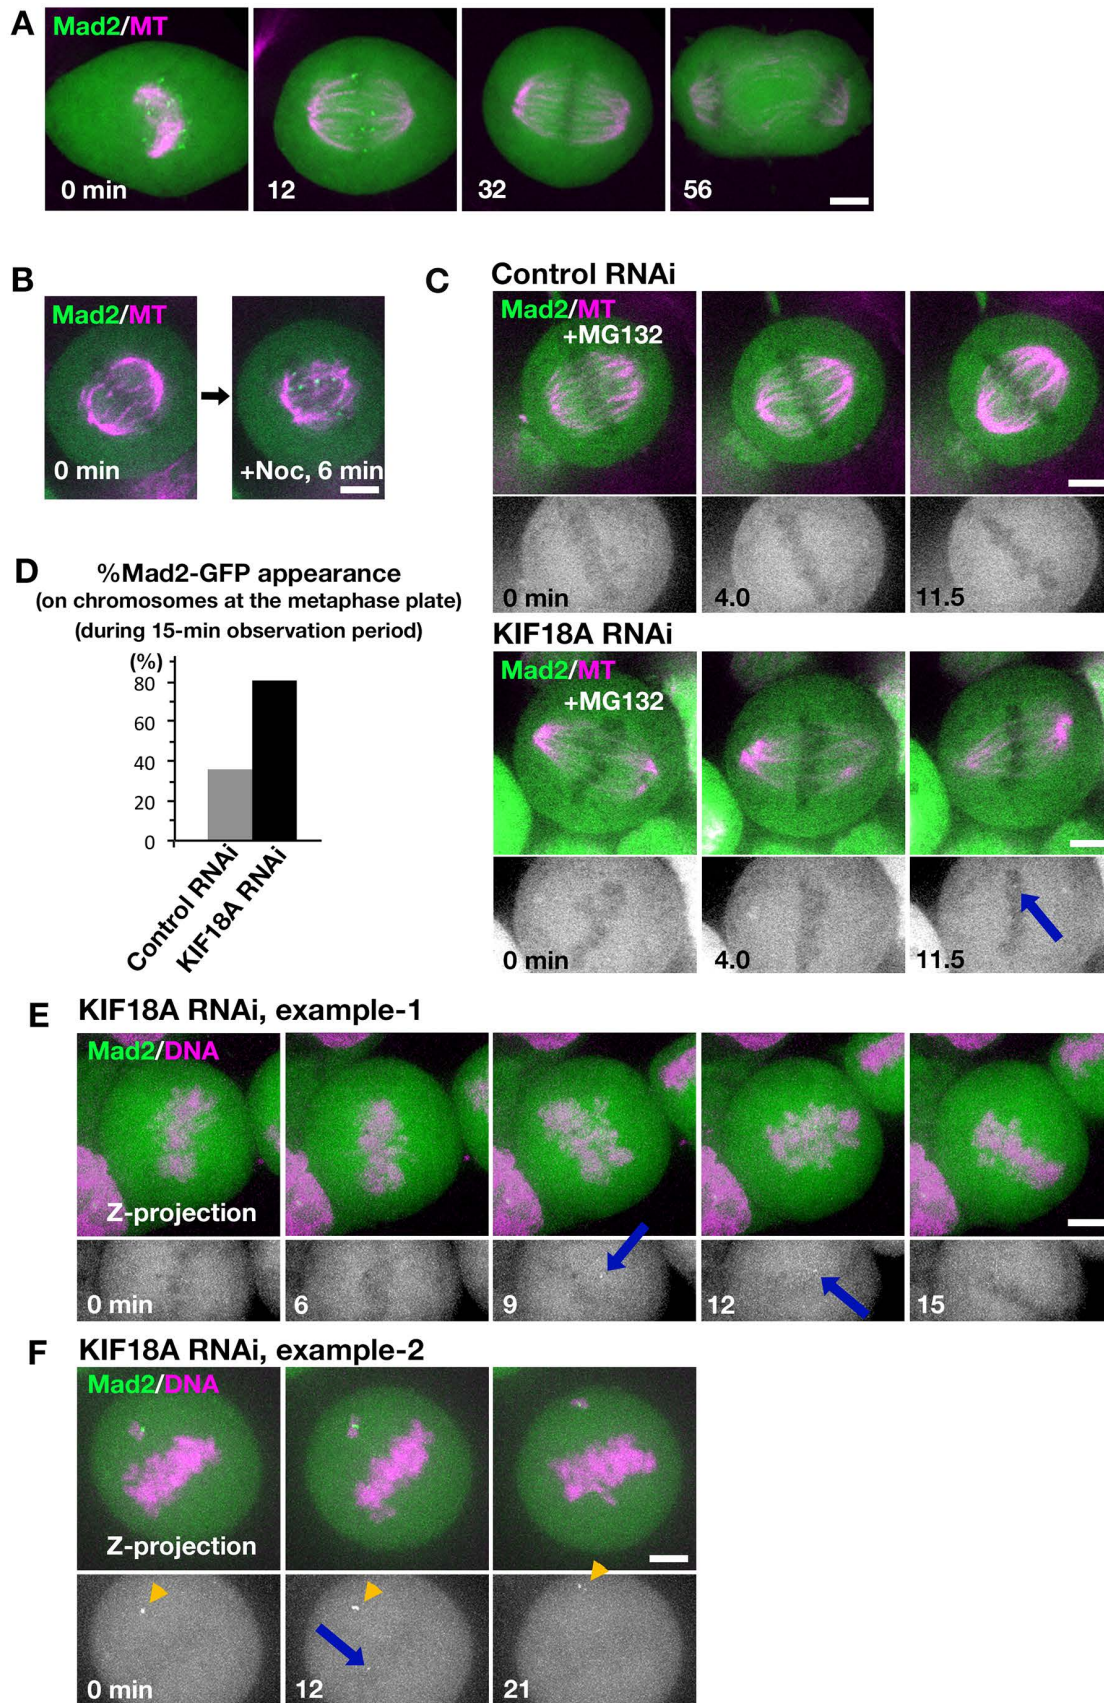

**Figure 7. GFP-Mad2 dynamics in the absence of KIF18A in HeLa cells**

(A) GFP-Mad2 localisation during mitosis in the control HeLa cell. Images were acquired from eleven z-sections (separated by 2  $\mu$ m) and are displayed after maximum projection. (B) Accumulation of GFP-Mad2 on kinetochores upon MT depolymerisation by nocodazole. Image was acquired every 30 s at a single focal plane. (C) Metaphase-arrested cells were imaged every 30 s at a single focal plane after control or KIF18A RNAi. Arrow indicates the appearance of a punctate GFP-Mad2 signal at the metaphase plate. (D) Frequency of the cells in which GFP-Mad2 appeared on chromosomes at the metaphase plate during the 15-min observation period. N = 47 each. (E, F) GFP-Mad2 appearance at the metaphase plate in KIF18 RNAi-treated cells (arrows). As a reference, brighter GFP-Mad2 signals on persistently unaligned chromosomes are shown in F (arrowheads). Maximum projection images are shown. Bars, 5  $\mu$ m.

## Figure S1

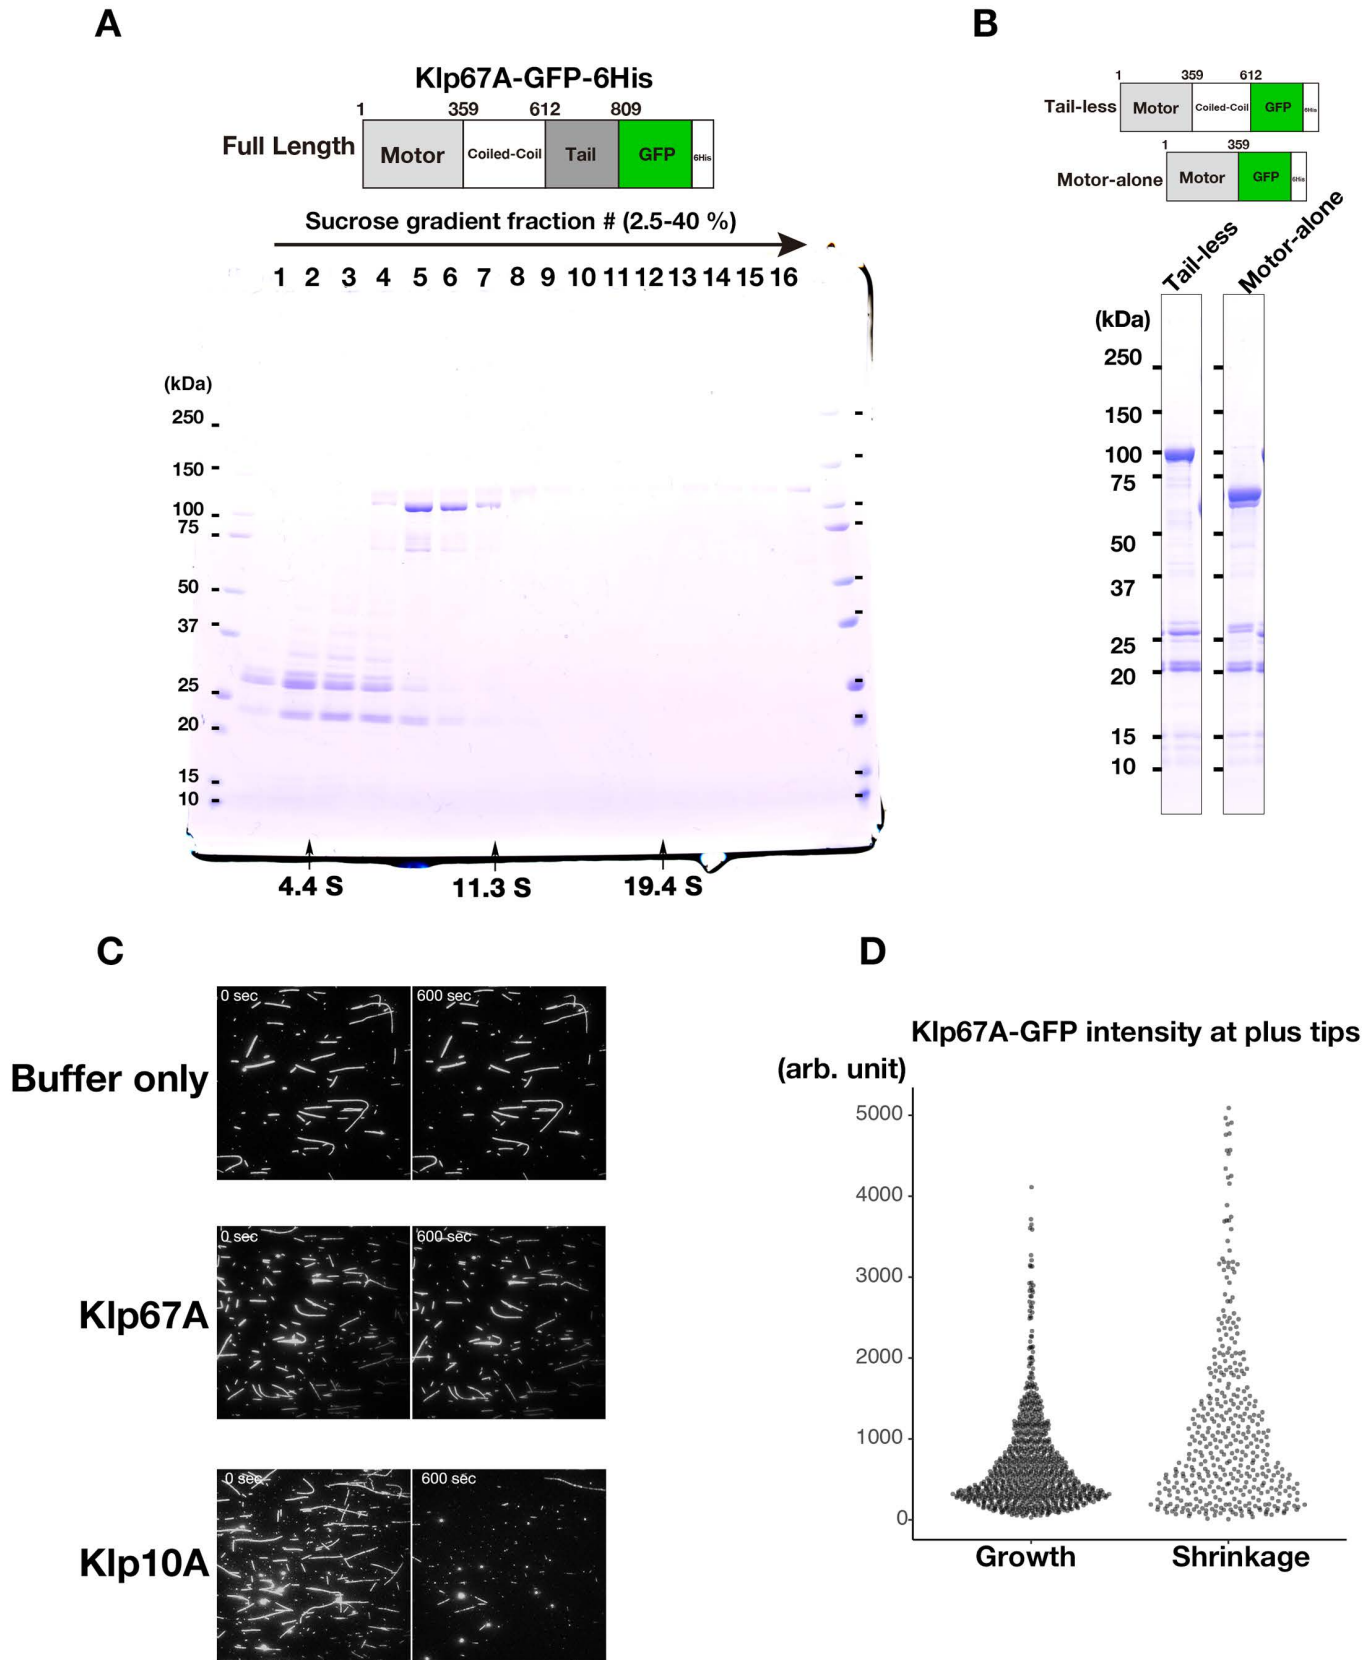

### Figure S1. Purification of kinesin-8<sup>Klp67A</sup>-GFP

(A) Coomassie staining of full-length kinesin-8<sup>Klp67A</sup> tagged with GFP and 6 x His after sucrose gradient centrifugation. BSA, catalase, and thyroglobulin were used as the markers (indicated by arrows). Fraction 6 was used for activity measurement. (B) Coomassie staining of purified, truncated kinesin-8<sup>Klp67A</sup> tagged with GFP and 6 x His. (C) Kinesin-8<sup>Klp67A</sup> (10 nM) cannot depolymerise GMPCPP-stabilised MTs. MTs stabilised with GMPCPP were mixed with full-length kinesin-8<sup>Klp67A</sup> (10 nM) and, as a positive control, MT depolymerase kinesin-13<sup>Klp10A</sup> (10 nM). Bar, 5  $\mu$ m. (D) Kinesin-8<sup>Klp67A</sup>-GFP intensities at the plus ends of growing and shrinking MTs (n = 891 and 409). The intensity was, on average, slightly higher on shrinking MTs ( $p < 0.001$ , Brunner-Munzel test).



## Figure S2

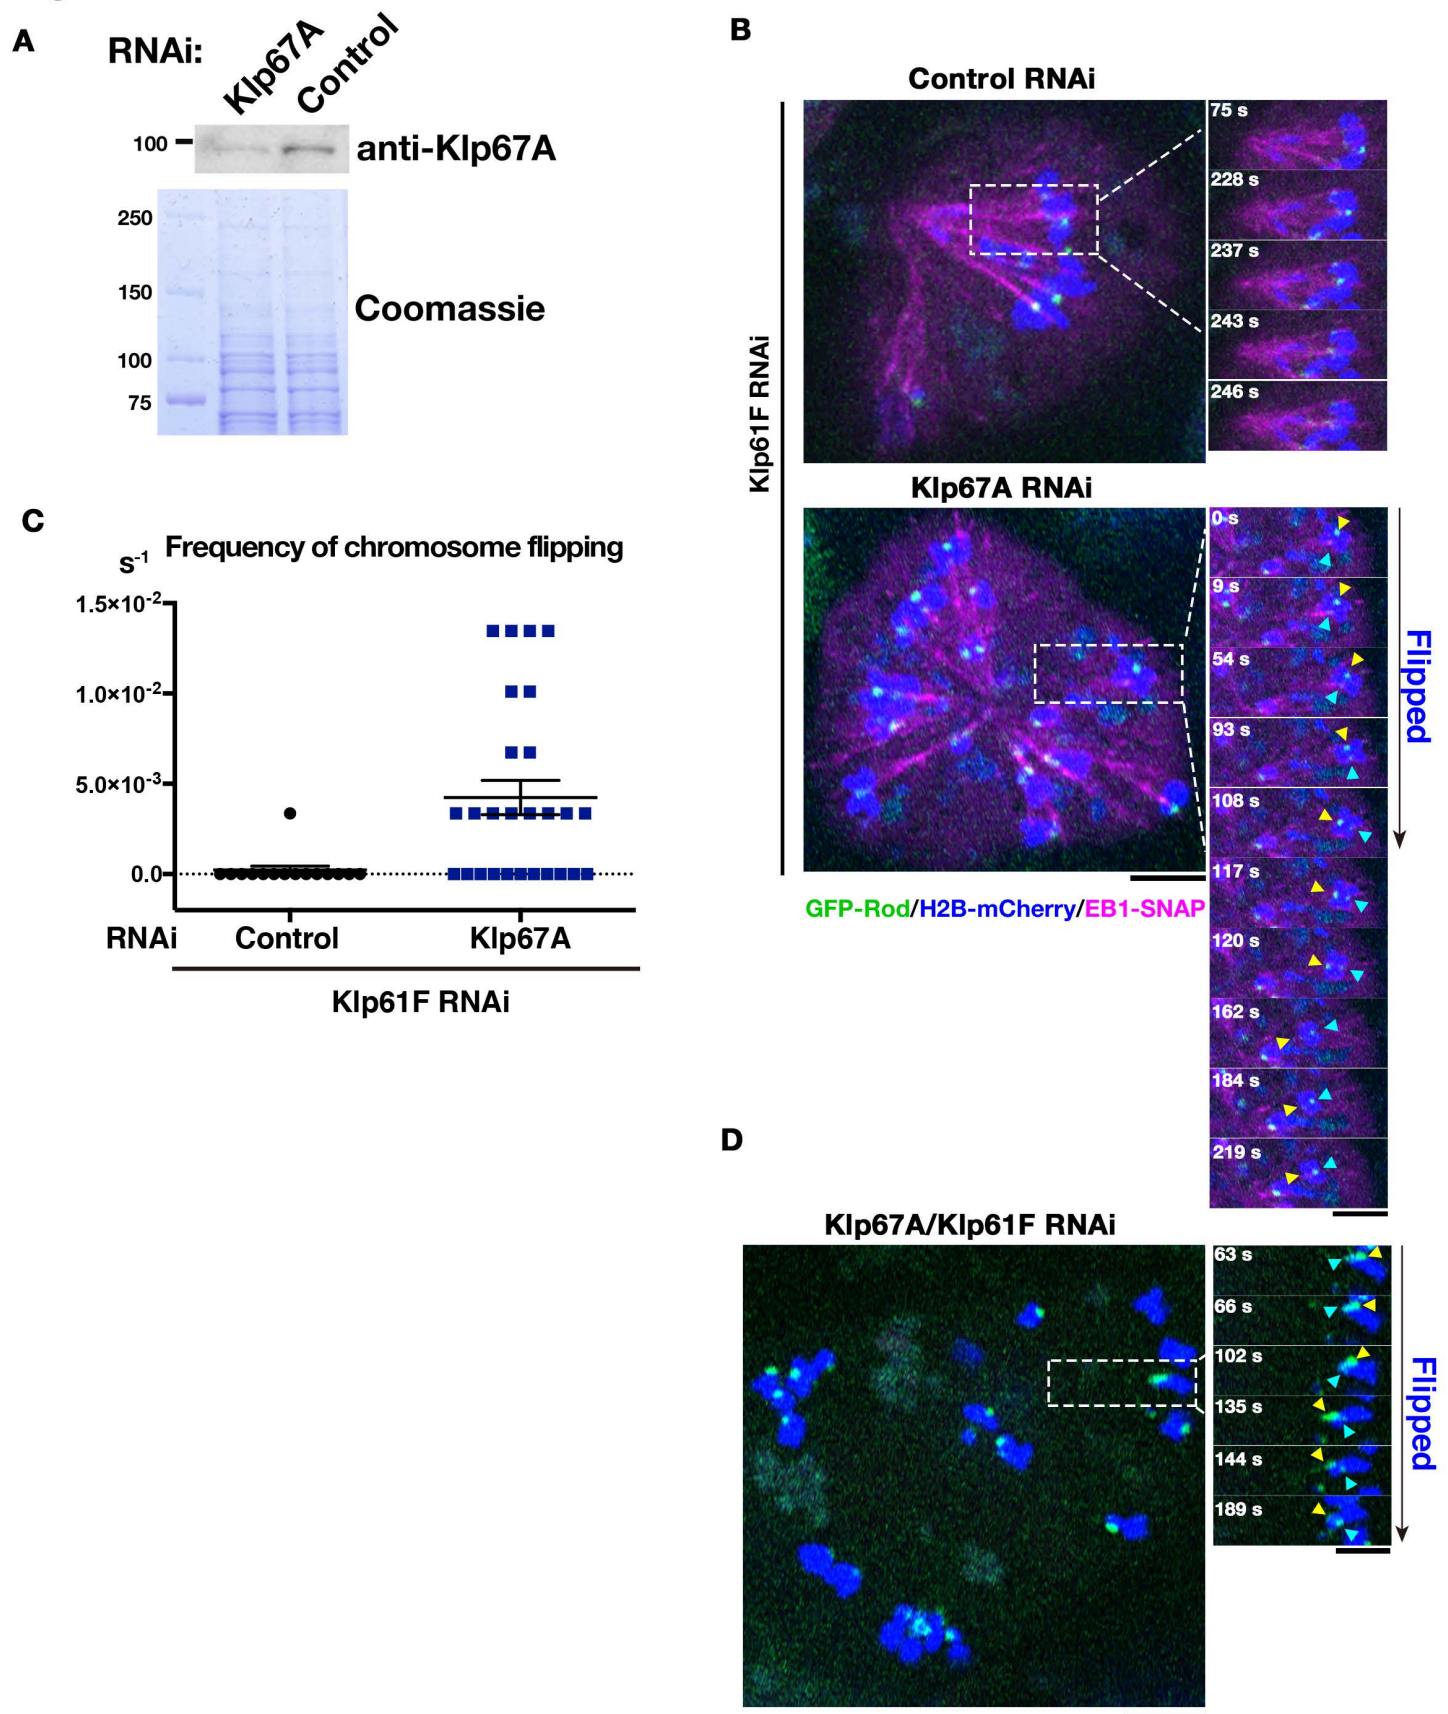

### Figure S2. Kinesin-8<sup>Klp67A</sup> RNAi causes MT attachment instability

(A) Immunoblotting confirmed 80% reduction of kinesin-8<sup>Klp67A</sup> protein after RNAi (GFP-CLASP<sup>Mast/Orbit</sup> expressing line was used). (B–D) MT attachment instability was not an artefact of SiR-tubulin staining, as the phenotype was reproduced without SiR-tubulin staining. In (B), MTs were visualized by expressing fluorescently labeled EB1, whereas MTs were not labelled in (D). (C) Chromosome flipping frequency was quantified (per cell, per sec,  $\pm$ SEM). 15 cells and 27 cells were analysed (control and Klp67A RNAi). Bars, 5  $\mu$ m.

## Figure S3

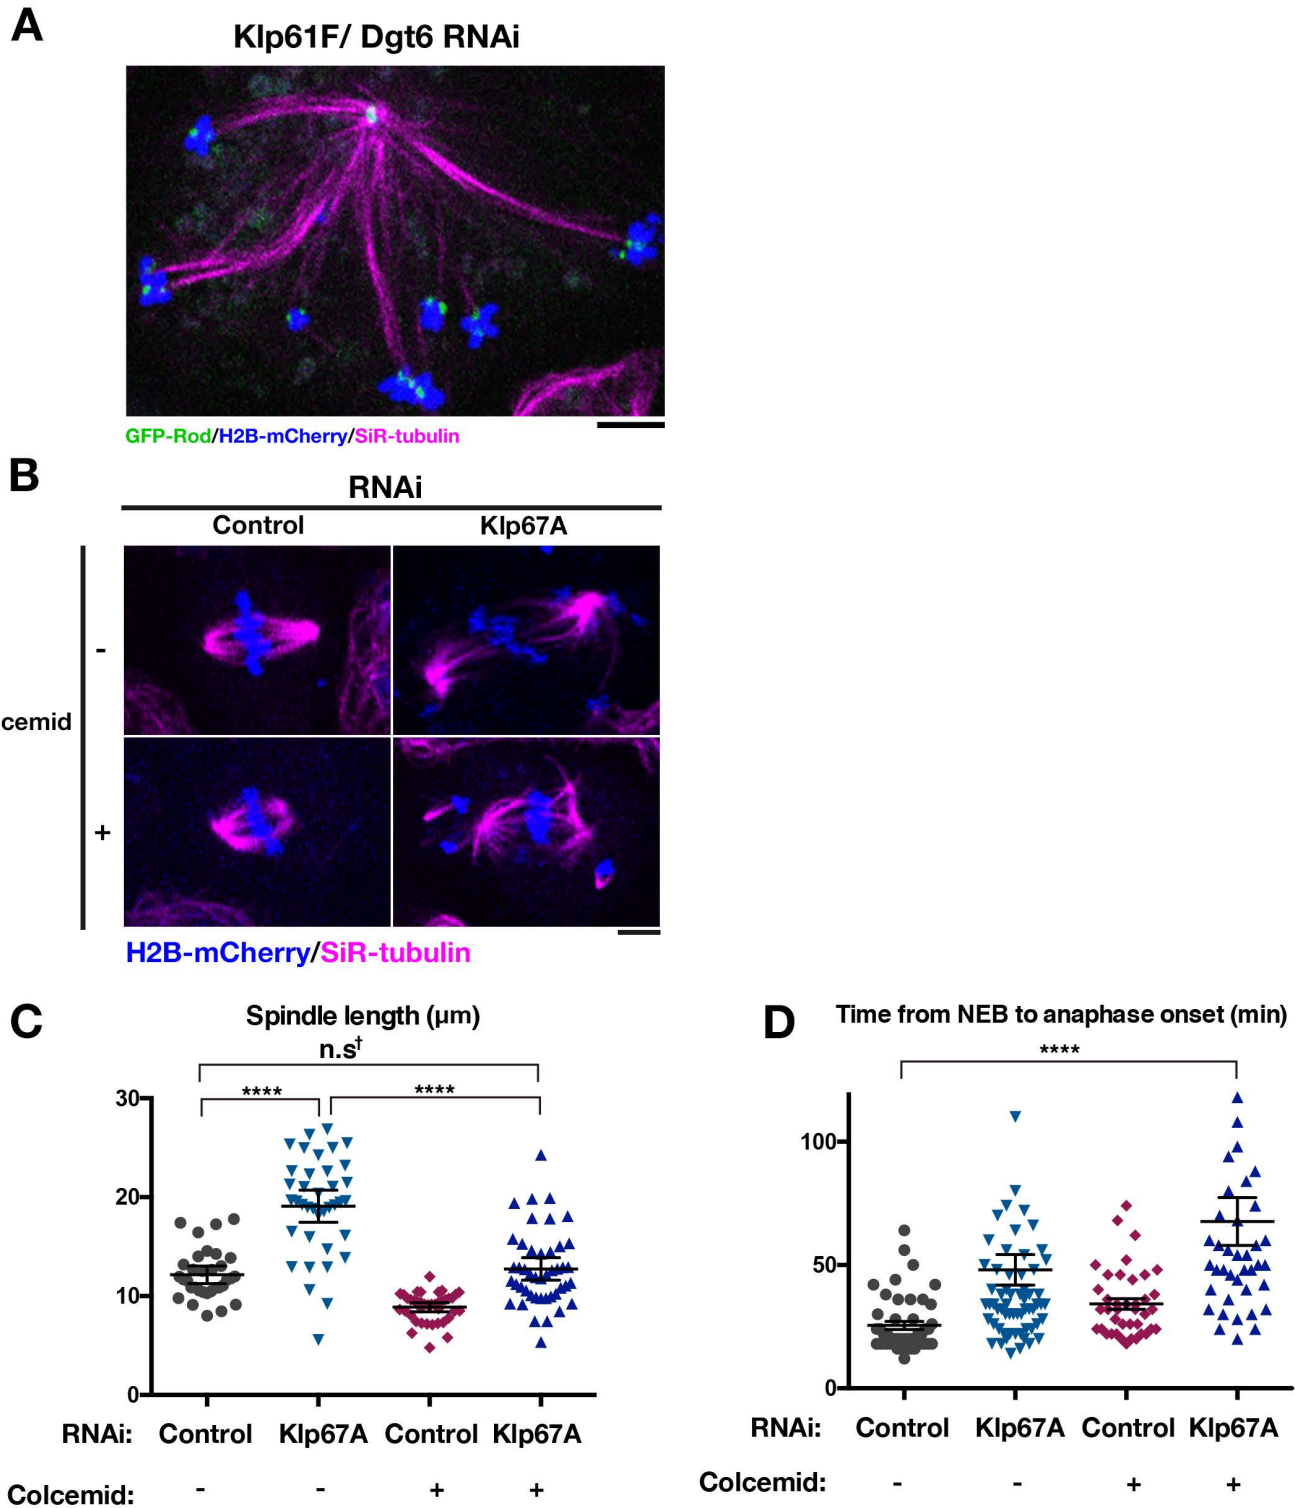

**Figure S3. Artificial MT shortening cannot rescue chromosome misalignment induced by kinesin-8<sup>Klp67A</sup> depletion**  
**(A)** Elongated monopolar spindle after double RNAi knockdown of augmin<sup>Dgt6</sup> and kinesin-5<sup>Klp61F</sup>. GFP-Rod signals indicated the presence of both monotelic and syntelic chromosomes. See Movie 4 for chromosome/kinetochore dynamics. **(B–D)** Force-shortening of the spindle by colcemid treatment (60 ng/mL) in kinesin-8<sup>Klp67A</sup> RNAi-treated cells did not recover chromosome misalignment **(B)** and mitotic progression **(D)**, despite that the spindle was shortened to the control level **(C)**. Spindle length was measured at 16 min after NEBD. Marked with † is the comparison between control RNAi and Klp67A RNAi + colcemid: mean difference = 0.59, 95 % confidence interval on the difference = [-1.28, 2.46]. \*\*\*\* indicates significant ( $p < 0.001$ ) difference by Games-Howell test.  $N = 33, 38, 45$  and  $40$  **(C)**; from left to right, and  $46, 66, 40, 41$  **(D)**, from left to right). Error bars indicate SEM. Experiments were performed twice, and the data from one experiment is presented. Two outliers obtained in kinesin-8<sup>Klp67A</sup> RNAi-treated cells in **(D)** are not described in the graph but were taken into account during mean and SEM calculations. Bars, 5  $\mu\text{m}$ .

## Figure S4

A

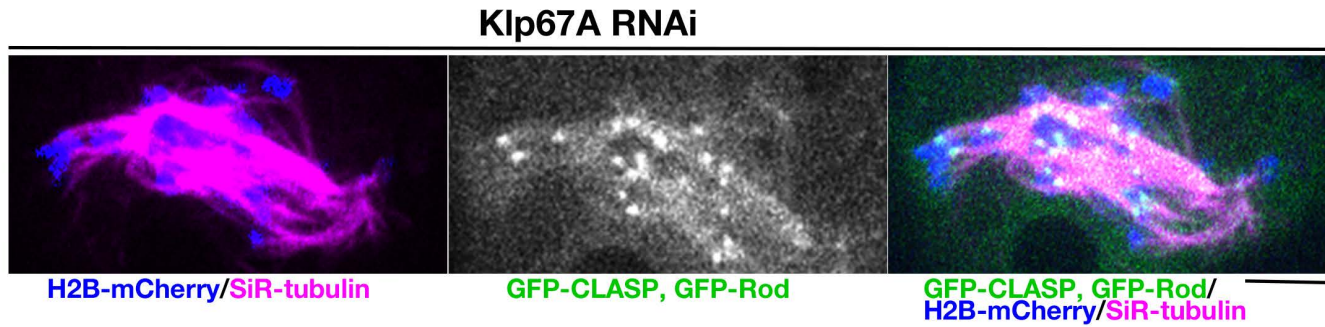

B

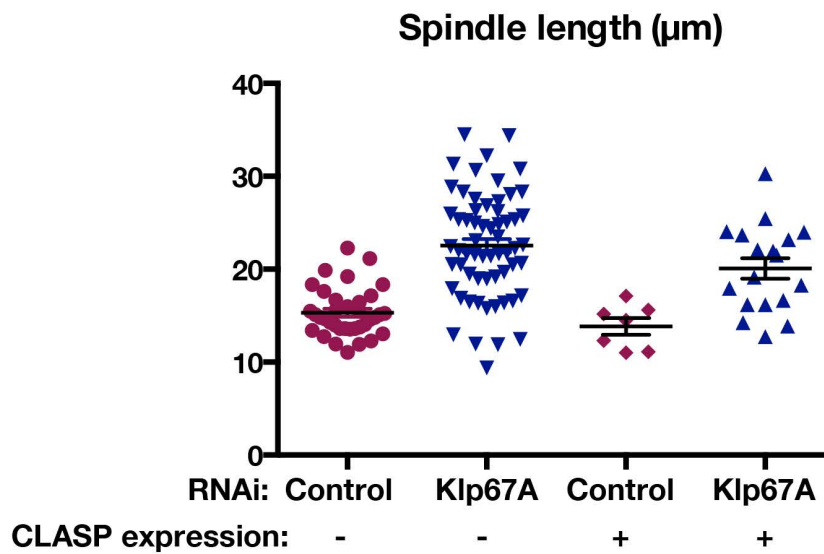

C

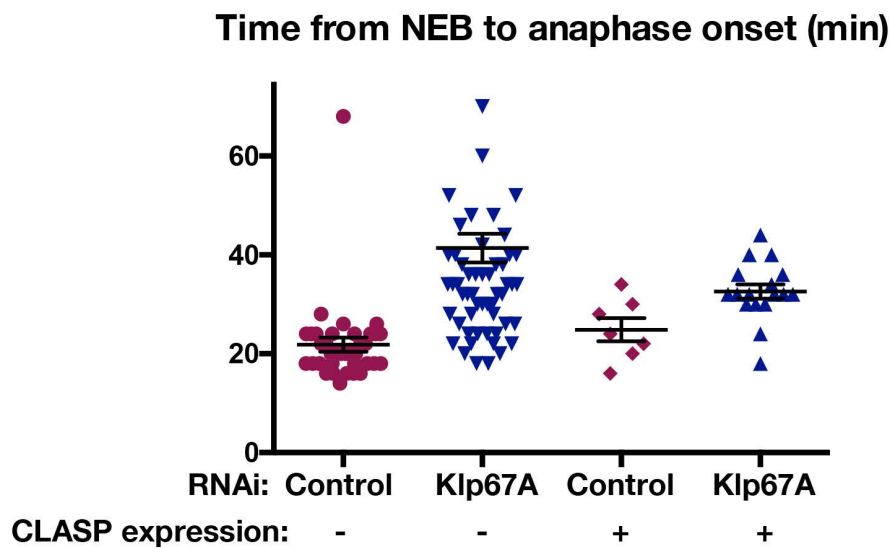

**Figure S4. CLASP<sup>Mast/Orbit</sup> overexpression cannot rescue chromosome misalignment induced by kinesin-8<sup>Klp67A</sup> depletion**

(A) A typical mitotic cell expressing GFP-CLASP<sup>Mast/Orbit</sup> following kinesin-8<sup>Klp67A</sup> RNAi. Chromosomes were severely misaligned in the spindle. (B, C) Metaphase spindle length and mitotic delay were also not rescued by CLASP<sup>Mast/Orbit</sup> overexpression (error bars represents SEM).
